# Supplementary material for: Genetic insights: High germline variant rate in an indigenous African cohort with early-onset colorectal cancer
Source: Frontiers journal article supplement (doi:10.3389/fonc.2023.1253867), 2023-10-27

## Genetic insights: High germline variant rate in an indigenous African cohort with early-onset colorectal cancer

\* Correspondence: Raj Ramesar: raj.ramesar@uct.ac.za

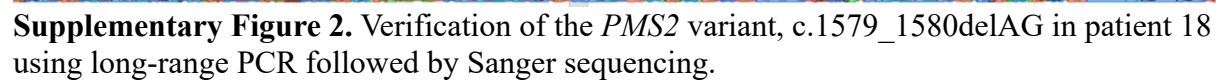

Supplement: Image_2.pdf [file Image_2.pdf]
