# Supplementary material for: Genetic insights: High germline variant rate in an indigenous African cohort with early-onset colorectal cancer
Source: Front Oncol. 2023 Oct 27;13:1253867. doi: 10.3389/fonc.2023.1253867 (PMC10642181; doi:10.3389/fonc.2023.1253867)
Supplement: Supplementary file 4 [file Table_1.xlsx]

## Sheet: Sheet2
Supplementary Material
Genetic insights: High germline variant rate in an indigenous African cohort with early-onset colorectal cancer
Safiye Yildiz, Takudzwa N. Musarurwa, Ursula Algar, Ramadhani Chambuso, George Rebello, Paul A. Goldberg, and Raj Ramesar*.
* Correspondence: Raj Ramesar: raj.ramesar@uct.ac.za
Supplementary Table 1

## Sheet: patients
Sample ID	Age Range	OnsetRange	Site	Side	MutPos	Variant	Gene	Cohort	IHC
1	30-40	belowfifty	colon	right	Yes	Pathogenic	MLH1	UCT	N/A
2	30-40	belowfifty	colon	left/right	Yes	Pathogenic	MLH1	UCT	N/A
3	30-40	belowfifty	colon	right	Yes	Pathogenic	MLH1	UCT	MLH1 negative
4	30-40	belowfifty	rectum	left	Yes	Pathogenic	MLH1	UCT	N/A
5	40-50	belowfifty	colon/rectum	left/right	Yes	Pathogenic	BMPR1A	UCT	N/A
6	20-30	belowfifty	colon	right	Yes	Pathogenic	BMPR1A	UCT	N/A
7	40-50	belowfifty	rectum	left	Yes	Pathogenic	MSH2	UCT	N/A
8	20-30	belowfifty	rectum	left	Yes	Likely Pathogenic	POLD1	UCT	No loss
9	30-40	belowfifty	rectum	left	Yes	Likely Pathogenic	BMPR1A	UCT	N/A
10	40-50	belowfifty	colon	left	Yes	Pathogenic	PMS2	UCT	No loss (PMS2 not tested)
11	30-40	belowfifty	rectum	left	Yes	Pathogenic	BMPR1A	UCT	N/A
12	40-50	belowfifty	colon	left	Yes	Pathogenic	MSH2	UCT	N/A
13	20-30	belowfifty	colon	N/A	Yes	Pathogenic	TP53	UCT	N/A
14	20-30	belowfifty	colon/rectum	left/right	Yes	Pathogenic	POLD1	UCT	No loss
15	20-30	belowfifty	rectum	left	Yes	Pathogenic	BMPR1A	UCT	N/A
16	50-60	aboveoratfifty	colon	right	Yes	Pathogenic	MSH2	UCT	MSH2 and MSH6 negative
17	20-30	belowfifty	rectum	left	Yes	Pathogenic	MSH2	UCT	MSH2 negative
18	50-60	aboveoratfifty	colon	left/right	Yes	Pathogenic	PMS2	UCT	N/A
19	20-30	belowfifty	colon	right	Yes	Likely Pathogenic	MSH2	UCT	MLH1 negative
20	40-50	belowfifty	colon	right	Yes	Pathogenic	MLH1	UCT	MLH1 and PMS2 negative
21	40-50	belowfifty	colon	right	Yes	Pathogenic	MSH2, PMS2	NCR	N/A
22	20-30	belowfifty	colon	right	Yes	Pathogenic	PMS2	NCR	N/A
23	30-40	belowfifty	colon	right	Yes	Pathogenic	MSH2	NCR	N/A
24	40-50	belowfifty	colon	right	Yes	Likely Pathogenic	MUTYH	NCR	N/A
25	30-40	belowfifty	colon	left	Yes	Pathogenic	MSH2	NCR	N/A
26	20-30	belowfifty	colon	right	Yes	Pathogenic	TP53	NCR	N/A
27	20-30	belowfifty	colon	right	Yes	Likely Pathogenic	APC	NCR	N/A
28	30-40	belowfifty	colon	right	No	None	None	UCT	N/A
29	30-40	belowfifty	colon	right	No	None	None	UCT	N/A
30	40-50	belowfifty	colon	left	No	None	None	UCT	N/A
31	30-40	belowfifty	colon	right	No	None	None	UCT	MLH1 negative
32	20-30	belowfifty	rectum	left	No	None	None	UCT	N/A
33	20-30	belowfifty	rectum	left	No	None	None	UCT	N/A
34	40-50	belowfifty	rectum	left	No	None	None	UCT	N/A
35	30-40	belowfifty	colon	right	No	None	None	UCT	N/A
36	20-30	belowfifty	rectum	left	No	None	None	UCT	N/A
37	40-50	belowfifty	colon	right	No		None	UCT	MLH1 and MSH6 negative
38	30-40	belowfifty	rectum	left	No	None	None	UCT	N/A
39	40-50	belowfifty	rectum	left	No	None	None	UCT	N/A
40	40-50	belowfifty	colon	left	No	None	None	UCT	N/A
41	20-30	belowfifty	rectum	left	No	None	None	UCT	N/A
42	40-50	belowfifty	colon	right	No	None	None	UCT	N/A
43	40-50	belowfifty	colon	right	No	None	None	UCT	No loss
44	20-30	belowfifty	colon	left	No	None	None	UCT	N/A
45	20-30	belowfifty	rectum	left	No	None	None	UCT	N/A
46	20-30	belowfifty	colon	right	No	None	None	UCT	N/A
47	30-40	belowfifty	rectum	left	No	None	None	UCT	MLH1 negative
48	20-30	belowfifty	rectum	left	No	None	None	UCT	N/A
49	30-40	belowfifty	colon	left	No	None	None	UCT	N/A
50	30-40	belowfifty	colon	left	No	None	None	UCT	N/A
51	20-30	belowfifty	rectum	left	No	None	None	UCT	N/A
52	40-50	belowfifty	colon	right	No	None	None	UCT	No loss
53	40-50	belowfifty	rectum	left	No	None	None	UCT	N/A
54	20-30	belowfifty	rectum	left	No	None	None	UCT	N/A
55	40-50	belowfifty	colon	left	No	None	None	UCT	No loss
56	30-40	belowfifty	colon	left/right	No	None	None	UCT	No loss (PMS2 not tested)
57	30-40	belowfifty	colon	right	No	None	None	UCT	MSH6
58	20-30	belowfifty	N/A	N/A	No	None	None	UCT	N/A
59	30-40	belowfifty	rectum	left	No	None	None	UCT	N/A
60	20-30	belowfifty	colon	right	No	None	None	UCT	No loss (PMS2 not tested)
61	20-30	belowfifty	colon	right	No	None	None	UCT	MLH1 negative
62	20-30	belowfifty	colon	left/right	No	None	None	UCT	N/A
63	30-40	belowfifty	colon	right	No	None	None	UCT	N/A
64	40-50	belowfifty	colon	N/A	No	None	None	UCT	MLH1 negative
65	30-40	belowfifty	colon	right	No	None	None	UCT	N/A
66	30-40	belowfifty	colon	left	No	None	None	UCT	N/A
67	40-50	belowfifty	colon	right	No	None	None	UCT	MSH2 and PMS2 negative
68	50-60	aboveoratfifty	colon	right	No	None	None	UCT	MLH1 and PMS2 negative
69	20-30	belowfifty	colon	left	No	None	None	UCT	No loss
70	40-50	belowfifty	colon	left	No	None	None	UCT	MLH1 and PMS2 negative, MSH2 and MSH6 intact
71	18-20	belowfifty	rectum	left	No	None	None	UCT	N/A
72	40-50	belowfifty	colon	N/A	No	None	None	NCR	N/A
73	30-40	belowfifty	colon	left	No	None	None	NCR	N/A
74	30-40	belowfifty	colon	right	No	None	None	NCR	N/A
75	40-50	belowfifty	colon	right	No	None	None	NCR	N/A
76	40-50	belowfifty	colon	left/right	No	None	None	NCR	N/A
77	30-40	belowfifty	colon	right	No	None	None	NCR	N/A
78	40-50	belowfifty	colon	right	No	None	None	NCR	N/A
79	40-50	belowfifty	colon	right	No	None	None	NCR	N/A
80	40-50	belowfifty	colon	right	No	None	None	NCR	N/A
81	18-20	belowfifty	colon	left	No	None	None	NCR	N/A
82	18-20	belowfifty	colon	right	No	None	None	NCR	N/A
83	30-40	belowfifty	colon	left	No	None	None	NCR	N/A
84	40-50	belowfifty	colon	right	No	None	None	NCR	N/A
85	40-50	belowfifty	colon	right	No	None	None	NCR	N/A
86	40-50	belowfifty	colon	left	No	None	None	NCR	N/A
87	20-30	belowfifty	rectum	left	No	None	None	NCR	N/A
88	20-30	belowfifty	colon	right	No	None	None	NCR	N/A
89	40-50	belowfifty	colon	left	No	None	None	NCR	N/A
90	30-40	belowfifty	colon	left	No	None	None	NCR	N/A
91	40-50	belowfifty	colon	right	No	None	None	NCR	N/A
92	20-30	belowfifty	colon	right	No	None	None	NCR	N/A
93	40-50	belowfifty	rectum	left	No	None	None	NCR	N/A
94	30-40	belowfifty	colon	left	No	None	None	NCR	N/A
95	40-50	belowfifty	colon	left	No	None	None	NCR	N/A
96	40-50	belowfifty	colon	right	No	None	None	NCR	N/A
97	30-40	belowfifty	colon	right	No	None	None	NCR	N/A
98	30-40	belowfifty	colon	left	No	None	None	NCR	N/A
99	30-40	belowfifty	colon	left	No	None	None	NCR	N/A
100	20-30	belowfifty	colon	right	No	None	None	NCR	N/A
101	40-50	belowfifty	colon	right	No	None	None	NCR	N/A
102	40-50	belowfifty	colon	right	No	None	None	NCR	N/A
103	30-40	belowfifty	colon	right	No	None	None	NCR	N/A
104	40-50	belowfifty	colon	N/A	No	None	None	NCR	N/A
105	20-30	belowfifty	colon	right	No	None	None	NCR	N/A
106	40-50	belowfifty	colon	N/A	No	None	None	NCR	N/A
107	30-40	belowfifty	rectum	left	No	None	None	NCR	N/A
