# Supplementary material for: Genetic insights: High germline variant rate in an indigenous African cohort with early-onset colorectal cancer
Source: Front Oncol. 2023 Oct 27;13:1253867. doi: 10.3389/fonc.2023.1253867 (PMC10642181; doi:10.3389/fonc.2023.1253867)
Supplement: Supplementary file 5 [file Table_2.xlsx]

## Sheet: Sheet2
Supplementary Material
Genetic insights: High germline variant rate in an indigenous African cohort with early-onset colorectal cancer
Safiye Yildiz, Takudzwa N. Musarurwa, Ursula Algar, Ramadhani Chambuso, George Rebello, Paul A. Goldberg, and Raj Ramesar*.
* Correspondence: Raj Ramesar: raj.ramesar@uct.ac.za
Supplementary Table 2

## Sheet: list of variants
##reference=hg19
##referenceURI=hg19
	Sample ID	# locus	type	ref	length	genotype	filter	pvalue	cnv_pvalue	coverage	allele_coverage	allele_ratio	%_frequency	maf	hrun	som_pval	gene	transcript	location	function	codon	exon	protein	coding	sift	polyphen	grantham	normalizedAlt	5000Exomes	FATHMM	NamedVariants	clinvar	cosmic	dbsnp	dgv	dra	drugbank	exac	go	omim	pfam	phylop	MyVariantDefaultDb_hg19
	1	chr3:37038109	SNV	G	1	G/A	PASS	3.1045595881283872E-117		567	G=295,A=272	G=0.5203,A=0.4797	47.97		1		MLH1	NM_000249.4	MLH1:splicesite_3:NM_000249.4	unknown		2	p.?	c.117-1G>A				A				pathogenic		rs587778896:rs587779950		(dui:ACMG59;dis:ACMG Recommendations...;g:MLH1)(dui:D009369;dis:Neoplasms;g:MLH1)(dui:D009371;dis:Neoplasms by Site;g:MLH1)(dui:D009358;dis:Congenital, Hereditary, and Neonatal Diseases and Abnormalities;g:MLH1)(dui:D030342;dis:Genetic Diseases, Inborn;g:MLH1)(dui:D009386;dis:Neoplastic Syndromes, Hereditary;g:MLH1)(dui:D003123;dis:Colorectal Neoplasms, Hereditary Nonpolyposis;g:MLH1)(dui:D004066…			GO:0016887:GO:0000712:GO:0006303:GO:0000795:GO:0001673:GO:0005654:GO:0003697:GO:0032407:GO:0005524:GO:0032300:GO:0032389:GO:0045190:GO:0007060:GO:0007283:GO:0008630:GO:0048304:GO:0003682:GO:0006298:GO:0045950:GO:0007129:GO:0000289:GO:0005712:GO:0043060:GO:0048298:GO:0051257:GO:0005634:GO:0045141:GO:0009617:GO:0005515:GO:0005715:GO:0048477:GO:0016020:GO:0016321:GO:0032137:GO:0016446:GO:0019899	120436	PF01119:PF02518:PF16413:PF13589	8.91
	2	chr3:37092136	SNV	A	1	A/G	PASS	1.1081536978184944E-35		216	A=124,G=92	A=0.5741,G=0.4259	42.59		1		MLH1	NM_000249.4	MLH1:exonic:NM_000249.4	missense	GGG	19	p.Arg755Gly	c.2263A>G	0.0	1.0	125.0	G				Pathogenic		rs267607900		(dui:ACMG59;dis:ACMG Recommendations...;g:MLH1)(dui:D009369;dis:Neoplasms;g:MLH1)(dui:D009371;dis:Neoplasms by Site;g:MLH1)(dui:D009358;dis:Congenital, Hereditary, and Neonatal Diseases and Abnormalities;g:MLH1)(dui:D030342;dis:Genetic Diseases, Inborn;g:MLH1)(dui:D009386;dis:Neoplastic Syndromes, Hereditary;g:MLH1)(dui:D003123;dis:Colorectal Neoplasms, Hereditary Nonpolyposis;g:MLH1)(dui:D004066…			GO:0016887:GO:0000712:GO:0006303:GO:0000795:GO:0001673:GO:0005654:GO:0003697:GO:0032407:GO:0005524:GO:0032300:GO:0032389:GO:0045190:GO:0007060:GO:0007283:GO:0008630:GO:0048304:GO:0003682:GO:0006298:GO:0045950:GO:0007129:GO:0000289:GO:0005712:GO:0043060:GO:0048298:GO:0051257:GO:0005634:GO:0045141:GO:0009617:GO:0005515:GO:0005715:GO:0048477:GO:0016020:GO:0016321:GO:0032137:GO:0016446:GO:0019899	120436	PF01119:PF02518:PF16413:PF13589	1.57
	3	chr3:37038109	SNV	G	1	A/A	PASS	8.511380382023899E-247	2460.7	254	G=2,A=252	G=0.0079,A=0.9921	99.21		1		MLH1	NM_000249.4	MLH1:splicesite_3:NM_000249.4	unknown		2	p.?	c.117-1G>A				A				Pathogenic		rs587778896:rs587779950		(dui:ACMG59;dis:ACMG Recommendations...;g:MLH1)(dui:D009369;dis:Neoplasms;g:MLH1)(dui:D009371;dis:Neoplasms by Site;g:MLH1)(dui:D009358;dis:Congenital, Hereditary, and Neonatal Diseases and Abnormalities;g:MLH1)(dui:D030342;dis:Genetic Diseases, Inborn;g:MLH1)(dui:D009386;dis:Neoplastic Syndromes, Hereditary;g:MLH1)(dui:D003123;dis:Colorectal Neoplasms, Hereditary Nonpolyposis;g:MLH1)(dui:D004066…			GO:0016887:GO:0000712:GO:0006303:GO:0000795:GO:0001673:GO:0005654:GO:0003697:GO:0032407:GO:0005524:GO:0032300:GO:0032389:GO:0045190:GO:0007060:GO:0007283:GO:0008630:GO:0048304:GO:0003682:GO:0006298:GO:0045950:GO:0007129:GO:0000289:GO:0005712:GO:0043060:GO:0048298:GO:0051257:GO:0005634:GO:0045141:GO:0009617:GO:0005515:GO:0005715:GO:0048477:GO:0016020:GO:0016321:GO:0032137:GO:0016446:GO:0019899	120436	PF01119:PF02518:PF16413:PF13589	8.91
	4	chr3:37058999	SNV	C	1	C/T	PASS	9.15377008362361E-94		438	C=225,T=213	C=0.5137,T=0.4863	48.63		1		MLH1	NM_000249.4	MLH1:exonic:NM_000249.4	missense	TGT	10	p.Arg265Cys	c.793C>T	0.0	1.0	180.0	T		1		Pathogenic	1422588:2985323	rs267607799:rs587779041:rs863225384:rs876660458:rs63751194:rs1559539068		(dui:ACMG59;dis:ACMG Recommendations...;g:MLH1)(dui:D009369;dis:Neoplasms;g:MLH1)(dui:D009371;dis:Neoplasms by Site;g:MLH1)(dui:D009358;dis:Congenital, Hereditary, and Neonatal Diseases and Abnormalities;g:MLH1)(dui:D030342;dis:Genetic Diseases, Inborn;g:MLH1)(dui:D009386;dis:Neoplastic Syndromes, Hereditary;g:MLH1)(dui:D003123;dis:Colorectal Neoplasms, Hereditary Nonpolyposis;g:MLH1)(dui:D004066…			GO:0016887:GO:0000712:GO:0006303:GO:0000795:GO:0001673:GO:0005654:GO:0003697:GO:0032407:GO:0005524:GO:0032300:GO:0032389:GO:0045190:GO:0007060:GO:0007283:GO:0008630:GO:0048304:GO:0003682:GO:0006298:GO:0045950:GO:0007129:GO:0000289:GO:0005712:GO:0043060:GO:0048298:GO:0051257:GO:0005634:GO:0045141:GO:0009617:GO:0005515:GO:0005715:GO:0048477:GO:0016020:GO:0016321:GO:0032137:GO:0016446:GO:0019899	120436	PF01119:PF02518:PF16413:PF13589	7.19
	5	chr10:88677049	SNV	C	1	C/A	PASS	8.035261221856193E-136		694	C=369,A=325	C=0.5317,A=0.4683	46.83		2		BMPR1A	NM_004329.3	BMPR1A:exonic:NM_004329.3	nonsense	TAA	9	p.Tyr278Ter	c.834C>A				A				Pathogenic		rs1230919713		(dui:ACMG59;dis:ACMG Recommendations...;g:BMPR1A)(dui:D009358;dis:Congenital, Hereditary, and Neonatal Diseases and Abnormalities;g:BMPR1A)(dui:D009369;dis:Neoplasms;g:BMPR1A)(dui:D009386;dis:Neoplastic Syndromes, Hereditary;g:BMPR1A)(dui:D030342;dis:Genetic Diseases, Inborn;g:BMPR1A)(dui:D004066;dis:Digestive System Diseases;g:BMPR1A)(dui:D005767;dis:Gastrointestinal Diseases;g:BMPR1A)(dui:D0074…	Dibotermin alfa		GO:0060045:GO:0060043:GO:0007179:GO:0009950:GO:1904414:GO:0021998:GO:0043025:GO:0009953:GO:0042733:GO:0003203:GO:0030425:GO:0005901:GO:0006955:GO:0048368:GO:0001701:GO:0071773:GO:0030509:GO:0035912:GO:0001707:GO:0050679:GO:0030501:GO:0019827:GO:0014032:GO:0003183:GO:0002053:GO:0003186:GO:0043235:GO:0048568:GO:0004674:GO:0001880:GO:0003222:GO:0003223:GO:0005886:GO:0000981:GO:0004675:GO:0021983:GO:…	601299	PF01064:PF00069:PF07714:PF08515	1.76
	6	chr10:88676930	INDEL	CA	1	CA/C	PASS	1.2852866599435577E-142		605	CA=296,C=309	CA=0.4893,C=0.5107	51.07		2		BMPR1A	NM_004329.3	BMPR1A:exonic:NM_004329.3	frameshiftDeletion	TTG	9	p.Val240LeufsTer21	c.717delA				C						rs199476084		(dui:ACMG59;dis:ACMG Recommendations...;g:BMPR1A)(dui:D009358;dis:Congenital, Hereditary, and Neonatal Diseases and Abnormalities;g:BMPR1A)(dui:D009369;dis:Neoplasms;g:BMPR1A)(dui:D009386;dis:Neoplastic Syndromes, Hereditary;g:BMPR1A)(dui:D030342;dis:Genetic Diseases, Inborn;g:BMPR1A)(dui:D004066;dis:Digestive System Diseases;g:BMPR1A)(dui:D005767;dis:Gastrointestinal Diseases;g:BMPR1A)(dui:D0074…	Dibotermin alfa		GO:0060045:GO:0060043:GO:0007179:GO:0009950:GO:1904414:GO:0021998:GO:0043025:GO:0009953:GO:0042733:GO:0003203:GO:0030425:GO:0005901:GO:0006955:GO:0048368:GO:0001701:GO:0071773:GO:0030509:GO:0035912:GO:0001707:GO:0050679:GO:0030501:GO:0019827:GO:0014032:GO:0003183:GO:0002053:GO:0003186:GO:0043235:GO:0048568:GO:0004674:GO:0001880:GO:0003222:GO:0003223:GO:0005886:GO:0000981:GO:0004675:GO:0021983:GO:…	601299	PF01064:PF00069:PF07714:PF08515	5.95,7.21
	7	chr2:47705577	SNV	C	1	C/T	PASS	6.804559249946362E-38		154	C=75,T=79	C=0.487,T=0.513	51.30		1		MSH2	NM_000251.3	MSH2:exonic:NM_000251.3	nonsense	TAG	14	p.Gln793Ter	c.2377C>T				T				Likely pathgenic		rs730881769		(dui:ACMG59;dis:ACMG Recommendations...;g:MSH2)(dui:D009369;dis:Neoplasms;g:MSH2)(dui:D009371;dis:Neoplasms by Site;g:MSH2)(dui:D009358;dis:Congenital, Hereditary, and Neonatal Diseases and Abnormalities;g:MSH2)(dui:D030342;dis:Genetic Diseases, Inborn;g:MSH2)(dui:D009386;dis:Neoplastic Syndromes, Hereditary;g:MSH2)(dui:D004066;dis:Digestive System Diseases;g:MSH2)(dui:D005767;dis:Gastrointestina…			GO:0007050:GO:0016447:GO:0016887:GO:0006281:GO:0008584:GO:0008022:GO:0008340:GO:0003690:GO:0042771:GO:0051096:GO:0003697:GO:0032405:GO:0006119:GO:0001701:GO:0030983:GO:0019724:GO:0019901:GO:0030183:GO:0006298:GO:0000784:GO:0048298:GO:0005634:GO:0002204:GO:0005515:GO:0071168:GO:0019237:GO:0010224:GO:0032357:GO:0016446:GO:0010165:GO:0006301:GO:0005654:GO:0006302:GO:0043524:GO:0000287:GO:0005524:GO:…	609309	PF01624:PF05188:PF05192:PF00488:PF05190	4.61
	8	chr19:50912082	SNV	C	1	C/A	PASS	6.01173737483273E-242	2412.21	1250	C=666,A=584	C=0.5328,A=0.4672	46.72		1		POLD1	NM_001256849.1	POLD1:exonic:NM_001256849.1	missense	ATG	15	p.Leu606Met	c.1816C>A	0.0	1.0	15.0	A		0.9		Uncertain significance	999696	rs1568630225		(dui:D009369;dis:Neoplasms;g:POLD1)(dui:D009371;dis:Neoplasms by Site;g:POLD1)(dui:D017437;dis:Skin and Connective Tissue Diseases;g:POLD1)(dui:D012871;dis:Skin Diseases;g:POLD1)(dui:D005261;dis:Female Urogenital Diseases and Pregnancy Complications;g:POLD1)(dui:D014565;dis:Urogenital Neoplasms;g:POLD1)(dui:D052776;dis:Female Urogenital Diseases;g:POLD1)(dui:D004066;dis:Digestive System Diseases;…			GO:0006281:GO:0043625:GO:0033683:GO:0006260:GO:0006261:GO:0006283:GO:0009411:GO:0006287:GO:0045004:GO:0000731:GO:0005654:GO:0000166:GO:0003887:GO:0032201:GO:0034644:GO:0071897:GO:0005829:GO:0016235:GO:0019985:GO:0070987:GO:0042769:GO:0006296:GO:0008296:GO:0000109:GO:0055089:GO:0000723:GO:0006297:GO:0003682:GO:0006298:GO:0003684:GO:0000784:GO:0003677:GO:0005634:GO:0005515:GO:0046872:GO:0016020:GO:…	174761	PF14260:PF03104:PF00136	2.58
	9	chr10:88649936	SNV	A	1	A/G	PASS	3.4514373933586494E-143		552	A=257,G=295	A=0.4656,G=0.5344	53.44		1		BMPR1A	NM_004329.3	BMPR1A:exonic:NM_004329.3	missense	TGT	4	p.Tyr62Cys	c.185A>G	0.0	0.952	194.0	G				Uncertain significance		rs1060503402		(dui:ACMG59;dis:ACMG Recommendations...;g:BMPR1A)(dui:D009358;dis:Congenital, Hereditary, and Neonatal Diseases and Abnormalities;g:BMPR1A)(dui:D009369;dis:Neoplasms;g:BMPR1A)(dui:D009386;dis:Neoplastic Syndromes, Hereditary;g:BMPR1A)(dui:D030342;dis:Genetic Diseases, Inborn;g:BMPR1A)(dui:D004066;dis:Digestive System Diseases;g:BMPR1A)(dui:D005767;dis:Gastrointestinal Diseases;g:BMPR1A)(dui:D0074…	Dibotermin alfa		GO:0060045:GO:0060043:GO:0007179:GO:0009950:GO:1904414:GO:0021998:GO:0043025:GO:0009953:GO:0042733:GO:0003203:GO:0030425:GO:0005901:GO:0006955:GO:0048368:GO:0001701:GO:0071773:GO:0030509:GO:0035912:GO:0001707:GO:0050679:GO:0030501:GO:0019827:GO:0014032:GO:0003183:GO:0002053:GO:0003186:GO:0043235:GO:0048568:GO:0004674:GO:0001880:GO:0003222:GO:0003223:GO:0005886:GO:0000981:GO:0004675:GO:0021983:GO:…	601299	PF01064:PF00069:PF07714:PF08515	8.57
	10	chr7:6018306	INDEL	AGTTAA	5	AGTTAA/A	PASS	1.4044296835779733E-78		358	AGTTAA=182,A=176	AGTTAA=0.5084,A=0.4916	49.16	0.0	1		PMS2	NM_000535.7	PMS2:exonic:NM_000535.7	frameshiftDeletion	TGC	13	p.Leu731CysfsTer3	c.2191_2195delTTAAC				A						rs587781958:rs1060503110:rs553141434:rs63750695		(dui:ACMG59;dis:ACMG Recommendations...;g:PMS2)(dui:D009369;dis:Neoplasms;g:PMS2)(dui:D009371;dis:Neoplasms by Site;g:PMS2)(dui:D004066;dis:Digestive System Diseases;g:PMS2)(dui:D004067;dis:Digestive System Neoplasms;g:PMS2)(dui:D005767;dis:Gastrointestinal Diseases;g:PMS2)(dui:D005770;dis:Gastrointestinal Neoplasms;g:PMS2)(dui:D007410;dis:Intestinal Diseases;g:PMS2)(dui:D007414;dis:Intestinal Ne…	Adenosine 5'-[gamma-thio]triphosphate	AF_EAS=0.0:AF_AFR=0.0:AF_SAS=0.0;7.137E-5:AF_FIN=0.0:AF_Adj=1.098E-5;1.006E-5:AF_NFE=0.0:AF_OTH=0.0:AF_AMR=0.0;9.796E-5	GO:0016887:GO:0036464:GO:0090305:GO:0006298:GO:0005886:GO:0005654:GO:0003697:GO:0032407:GO:0003677:GO:0005524:GO:0005634:GO:0005515:GO:0004519:GO:0042493:GO:0032300:GO:0005829:GO:0032389:GO:0016446:GO:0032138	600259	PF08676:PF01119:PF02518:PF07661:PF13589	-0.22,9.23,4.22,1.32,8.74,1.22
	11	chr10:88676930	INDEL	CA	1	CA/C	PASS	5.023425895223794E-106		419	CA=198,C=221	CA=0.4726,C=0.5274	52.74		2		BMPR1A	NM_004329.3	BMPR1A:exonic:NM_004329.3	frameshiftDeletion	TTG	9	p.Val240LeufsTer21	c.717delA				C						rs199476084		(dui:ACMG59;dis:ACMG Recommendations...;g:BMPR1A)(dui:D009358;dis:Congenital, Hereditary, and Neonatal Diseases and Abnormalities;g:BMPR1A)(dui:D009369;dis:Neoplasms;g:BMPR1A)(dui:D009386;dis:Neoplastic Syndromes, Hereditary;g:BMPR1A)(dui:D030342;dis:Genetic Diseases, Inborn;g:BMPR1A)(dui:D004066;dis:Digestive System Diseases;g:BMPR1A)(dui:D005767;dis:Gastrointestinal Diseases;g:BMPR1A)(dui:D0074…	Dibotermin alfa		GO:0060045:GO:0060043:GO:0007179:GO:0009950:GO:1904414:GO:0021998:GO:0043025:GO:0009953:GO:0042733:GO:0003203:GO:0030425:GO:0005901:GO:0006955:GO:0048368:GO:0001701:GO:0071773:GO:0030509:GO:0035912:GO:0001707:GO:0050679:GO:0030501:GO:0019827:GO:0014032:GO:0003183:GO:0002053:GO:0003186:GO:0043235:GO:0048568:GO:0004674:GO:0001880:GO:0003222:GO:0003223:GO:0005886:GO:0000981:GO:0004675:GO:0021983:GO:…	601299	PF01064:PF00069:PF07714:PF08515	5.95,7.21
	12	chr2:47630512	INDEL	AG	1	AG/A	PASS	3.261369459408822E-98		439	AG=206,A=233	AG=0.4692,A=0.5308	53.08		5		MSH2	NM_000251.3	MSH2:exonic:NM_000251.3	nonsense	TGA	1	p.Val63Ter	c.187delG				A				Pathogenic		rs1553348882:rs587779113:rs751082926:rs63750160:rs1553348867		(dui:ACMG59;dis:ACMG Recommendations...;g:MSH2)(dui:D009369;dis:Neoplasms;g:MSH2)(dui:D009371;dis:Neoplasms by Site;g:MSH2)(dui:D009358;dis:Congenital, Hereditary, and Neonatal Diseases and Abnormalities;g:MSH2)(dui:D030342;dis:Genetic Diseases, Inborn;g:MSH2)(dui:D009386;dis:Neoplastic Syndromes, Hereditary;g:MSH2)(dui:D004066;dis:Digestive System Diseases;g:MSH2)(dui:D005767;dis:Gastrointestina…		AF_EAS=0.0;0.0;0.0:AF_AFR=0.0;0.0;0.0:AF_SAS=0.0;0.0;0.0:AF_FIN=0.0;2.549E-3;0.0:AF_Adj=1.192E-5;1.192E-4;1.192E-5:AF_NFE=4.119E-5;0.0;2.06E-5:AF_OTH=0.0;0.0;0.0:AF_AMR=0.0;0.0;1.546E-4	GO:0007050:GO:0016447:GO:0016887:GO:0006281:GO:0008584:GO:0008022:GO:0008340:GO:0003690:GO:0042771:GO:0051096:GO:0003697:GO:0032405:GO:0006119:GO:0001701:GO:0030983:GO:0019724:GO:0019901:GO:0030183:GO:0006298:GO:0000784:GO:0048298:GO:0005634:GO:0002204:GO:0005515:GO:0071168:GO:0019237:GO:0010224:GO:0032357:GO:0016446:GO:0010165:GO:0006301:GO:0005654:GO:0006302:GO:0043524:GO:0000287:GO:0005524:GO:…	609309	PF01624:PF05188:PF05192:PF00488:PF05190	5.26,0.62
	13	chr17:7578404	SNV	A	1	A/G	PASS	1.0543868963913184E-263		1235	A=631,G=604	A=0.5109,G=0.4891	48.91		1		TP53	NM_000546.5	TP53:exonic:NM_000546.5	missense	CGC	5	p.Cys176Arg	c.526T>C	0.0	1.0	180.0	G		01:01:01		Likely pathogenic	44146:44948:44692:43613:44503:44759	rs1567552847:rs967461896		(dui:ACMG59;dis:ACMG Recommendations...;g:TP53)(dui:D009369;dis:Neoplasms;g:TP53)(dui:D009370;dis:Neoplasms by Histologic Type;g:TP53)(dui:D009371;dis:Neoplasms by Site;g:TP53)(dui:D009375;dis:Neoplasms, Glandular and Epithelial;g:TP53)(dui:D002277;dis:Carcinoma;g:TP53)(dui:D004066;dis:Digestive System Diseases;g:TP53)(dui:D004067;dis:Digestive System Neoplasms;g:TP53)(dui:D000230;dis:Adenocarcin…	Zinc chloride:AZD 3355:Triethyl phosphate:Acetylsalicylic acid:Zinc acetate:Zinc sulfate, unspecified form:Zinc:1-(9-ethyl-9H-carbazol-3-yl)-N-methylmethanamine		GO:0043504:GO:0008340:GO:0000978:GO:0008104:GO:0002360:GO:0006289:GO:0042771:GO:1903800:GO:0000733:GO:0048512:GO:0097371:GO:0043621:GO:0002244:GO:0097252:GO:0003730:GO:0071494:GO:0051123:GO:0007406:GO:0005507:GO:0045892:GO:0001701:GO:0030308:GO:0045893:GO:0046982:GO:1990248:GO:0051087:GO:0034103:GO:0051402:GO:0035033:GO:0043516:GO:0019901:GO:0035035:GO:0035794:GO:0036003:GO:0019903:GO:0042826:GO:…	191170		9.29
	14	chr19:50909458	INDEL	T	1	T/TG	PASS	1.8793168168032723E-199		827	T=398,TG=429	T=0.4813,TG=0.5187	51.87		3		POLD1	NM_001256849.1	POLD1:exonic:NM_001256849.1	frameshiftInsertion		11	p.Arg423ProfsTer212	c.1265_1266insG				TG						rs1367048783		(dui:D009369;dis:Neoplasms;g:POLD1)(dui:D009371;dis:Neoplasms by Site;g:POLD1)(dui:D017437;dis:Skin and Connective Tissue Diseases;g:POLD1)(dui:D012871;dis:Skin Diseases;g:POLD1)(dui:D005261;dis:Female Urogenital Diseases and Pregnancy Complications;g:POLD1)(dui:D014565;dis:Urogenital Neoplasms;g:POLD1)(dui:D052776;dis:Female Urogenital Diseases;g:POLD1)(dui:D004066;dis:Digestive System Diseases;…			GO:0006281:GO:0043625:GO:0033683:GO:0006260:GO:0006261:GO:0006283:GO:0009411:GO:0006287:GO:0045004:GO:0000731:GO:0005654:GO:0000166:GO:0003887:GO:0032201:GO:0034644:GO:0071897:GO:0005829:GO:0016235:GO:0019985:GO:0070987:GO:0042769:GO:0006296:GO:0008296:GO:0000109:GO:0055089:GO:0000723:GO:0006297:GO:0003682:GO:0006298:GO:0003684:GO:0000784:GO:0003677:GO:0005634:GO:0005515:GO:0046872:GO:0016020:GO:…	174761	PF14260:PF03104:PF00136	7.03
	15	chr10:88659572	SNV	C	1	C/T	PASS	4.395416154378252E-99		352	C=157,T=195	C=0.446,T=0.554	55.40		1		BMPR1A	NM_004329.3	BMPR1A:exonic:NM_004329.3	missense	TGC	6	p.Arg119Cys	c.355C>T	0.0	1.0	180.0	T				Conflicting interpretations of pathogenicity		rs587782494		(dui:ACMG59;dis:ACMG Recommendations...;g:BMPR1A)(dui:D009358;dis:Congenital, Hereditary, and Neonatal Diseases and Abnormalities;g:BMPR1A)(dui:D009369;dis:Neoplasms;g:BMPR1A)(dui:D009386;dis:Neoplastic Syndromes, Hereditary;g:BMPR1A)(dui:D030342;dis:Genetic Diseases, Inborn;g:BMPR1A)(dui:D004066;dis:Digestive System Diseases;g:BMPR1A)(dui:D005767;dis:Gastrointestinal Diseases;g:BMPR1A)(dui:D0074…	Dibotermin alfa		GO:0060045:GO:0060043:GO:0007179:GO:0009950:GO:1904414:GO:0021998:GO:0043025:GO:0009953:GO:0042733:GO:0003203:GO:0030425:GO:0005901:GO:0006955:GO:0048368:GO:0001701:GO:0071773:GO:0030509:GO:0035912:GO:0001707:GO:0050679:GO:0030501:GO:0019827:GO:0014032:GO:0003183:GO:0002053:GO:0003186:GO:0043235:GO:0048568:GO:0004674:GO:0001880:GO:0003222:GO:0003223:GO:0005886:GO:0000981:GO:0004675:GO:0021983:GO:…	601299	PF01064:PF00069:PF07714:PF08515	2.46
	16	chr2:47698146	INDEL	AGA	2	AGA/A	PASS	2.1812226560835347E-48		181	AGA=84,A=97	AGA=0.4641,A=0.5359	53.59		1		MSH2	NM_000251.3	MSH2:exonic:NM_000251.3	frameshiftDeletion	ATA	11	p.Glu569IlefsTer2	c.1705_1706delGA				A				Pathogenic		rs63750393:rs63749883:rs587779106:rs1553367640:rs786201077:rs1449130671:rs281864941		(dui:ACMG59;dis:ACMG Recommendations...;g:MSH2)(dui:D009369;dis:Neoplasms;g:MSH2)(dui:D009371;dis:Neoplasms by Site;g:MSH2)(dui:D009358;dis:Congenital, Hereditary, and Neonatal Diseases and Abnormalities;g:MSH2)(dui:D030342;dis:Genetic Diseases, Inborn;g:MSH2)(dui:D009386;dis:Neoplastic Syndromes, Hereditary;g:MSH2)(dui:D004066;dis:Digestive System Diseases;g:MSH2)(dui:D005767;dis:Gastrointestina…			GO:0007050:GO:0016447:GO:0016887:GO:0006281:GO:0008584:GO:0008022:GO:0008340:GO:0003690:GO:0042771:GO:0051096:GO:0003697:GO:0032405:GO:0006119:GO:0001701:GO:0030983:GO:0019724:GO:0019901:GO:0030183:GO:0006298:GO:0000784:GO:0048298:GO:0005634:GO:0002204:GO:0005515:GO:0071168:GO:0019237:GO:0010224:GO:0032357:GO:0016446:GO:0010165:GO:0006301:GO:0005654:GO:0006302:GO:0043524:GO:0000287:GO:0005524:GO:…	609309	PF01624:PF05188:PF05192:PF00488:PF05190	-1.55,9.3,8.8
	17	chr2:47637247	INDEL							198			63.1313				MSH2	NM_000251.3	MSH2:exonic:NM_000251.3	frameshiftDeletion		3	p.Gln130ValfsTer2	c.387_388delTC
	18	chr7:6026815	INDEL	CCT	2	CCT/C	PASS	1.9111729942272104E-89		538	CCT=302,C=236	CCT=0.5613,C=0.4387	43.87		4		PMS2	NM_000535.7	PMS2:exonic:NM_000535.7	frameshiftDeletion	GGG	11	p.Arg527GlyfsTer14	c.1579_1580delAG				C				Pathogenic		rs1064793234:rs756823316:rs1554297523		(dui:ACMG59;dis:ACMG Recommendations...;g:PMS2)(dui:D009369;dis:Neoplasms;g:PMS2)(dui:D009371;dis:Neoplasms by Site;g:PMS2)(dui:D004066;dis:Digestive System Diseases;g:PMS2)(dui:D004067;dis:Digestive System Neoplasms;g:PMS2)(dui:D005767;dis:Gastrointestinal Diseases;g:PMS2)(dui:D005770;dis:Gastrointestinal Neoplasms;g:PMS2)(dui:D007410;dis:Intestinal Diseases;g:PMS2)(dui:D007414;dis:Intestinal Ne…	Adenosine 5'-[gamma-thio]triphosphate	AF_EAS=0.0:AF_AFR=0.0:AF_SAS=0.0:AF_FIN=0.0:AF_Adj=8.319E-6:AF_NFE=1.516E-5:AF_OTH=0.0:AF_AMR=0.0	GO:0016887:GO:0036464:GO:0090305:GO:0006298:GO:0005886:GO:0005654:GO:0003697:GO:0032407:GO:0003677:GO:0005524:GO:0005634:GO:0005515:GO:0004519:GO:0042493:GO:0032300:GO:0005829:GO:0032389:GO:0016446:GO:0032138	600259	PF08676:PF01119:PF02518:PF07661:PF13589	0.13,0.18,-0.6
	19	chr2:47637509	SNV	C	1	C/A	PASS	2.529297996446096E-190		820	C=404,A=416	C=0.4927,A=0.5073	50.73		1		MSH2	NM_000251.3	MSH2:exonic:NM_000251.3	missense	AAG	3	p.Gln215Lys	c.643C>A	0.18	0.055	53.0	A		0.99			3185899	rs1573442100:rs63751274:rs63751695:rs1558459885:rs1558459882		(dui:ACMG59;dis:ACMG Recommendations...;g:MSH2)(dui:D009369;dis:Neoplasms;g:MSH2)(dui:D009371;dis:Neoplasms by Site;g:MSH2)(dui:D009358;dis:Congenital, Hereditary, and Neonatal Diseases and Abnormalities;g:MSH2)(dui:D030342;dis:Genetic Diseases, Inborn;g:MSH2)(dui:D009386;dis:Neoplastic Syndromes, Hereditary;g:MSH2)(dui:D004066;dis:Digestive System Diseases;g:MSH2)(dui:D005767;dis:Gastrointestina…			GO:0007050:GO:0016447:GO:0016887:GO:0006281:GO:0008584:GO:0008022:GO:0008340:GO:0003690:GO:0042771:GO:0051096:GO:0003697:GO:0032405:GO:0006119:GO:0001701:GO:0030983:GO:0019724:GO:0019901:GO:0030183:GO:0006298:GO:0000784:GO:0048298:GO:0005634:GO:0002204:GO:0005515:GO:0071168:GO:0019237:GO:0010224:GO:0032357:GO:0016446:GO:0010165:GO:0006301:GO:0005654:GO:0006302:GO:0043524:GO:0000287:GO:0005524:GO:…	609309	PF01624:PF05188:PF05192:PF00488:PF05190	6.18
	20	chr3:37083822	SNV	G	1	G/A	PASS	4.3832879341925006E-75		413	G=227,A=186	G=0.5496,A=0.4504	45.04		2		MLH1	NM_000249.4	MLH1:exonic:NM_000249.4	synonymous	TCA	15	p.Ser577=	c.1731G>A				A		0.88		Pathogenic	25900	rs63751657		(dui:ACMG59;dis:ACMG Recommendations...;g:MLH1)(dui:D009369;dis:Neoplasms;g:MLH1)(dui:D009371;dis:Neoplasms by Site;g:MLH1)(dui:D009358;dis:Congenital, Hereditary, and Neonatal Diseases and Abnormalities;g:MLH1)(dui:D030342;dis:Genetic Diseases, Inborn;g:MLH1)(dui:D009386;dis:Neoplastic Syndromes, Hereditary;g:MLH1)(dui:D003123;dis:Colorectal Neoplasms, Hereditary Nonpolyposis;g:MLH1)(dui:D004066…			GO:0016887:GO:0000712:GO:0006303:GO:0000795:GO:0001673:GO:0005654:GO:0003697:GO:0032407:GO:0005524:GO:0032300:GO:0032389:GO:0045190:GO:0007060:GO:0007283:GO:0008630:GO:0048304:GO:0003682:GO:0006298:GO:0045950:GO:0007129:GO:0000289:GO:0005712:GO:0043060:GO:0048298:GO:0051257:GO:0005634:GO:0045141:GO:0009617:GO:0005515:GO:0005715:GO:0048477:GO:0016020:GO:0016321:GO:0032137:GO:0016446:GO:0019899	120436	PF01119:PF02518:PF16413:PF13589	0.49
	21	chr2:47702327	SNV	T	1	T/A	PASS	3.283976192504779E-24		208	T=133,A=75	T=0.6394,A=0.3606	36.06				MSH2	NM_000251.2	MSH2:exonic:NM_000251.2	nonsense	TGA	12	p.Cys641Ter	c.1923T>A				A								(dui:ACMG59;dis:ACMG Recommendations...;g:MSH2)(dui:D009369;dis:Neoplasms;g:MSH2)(dui:D009371;dis:Neoplasms by Site;g:MSH2)(dui:D009358;dis:Congenital, Hereditary, and Neonatal Diseases and Abnormalities;g:MSH2)(dui:D030342;dis:Genetic Diseases, Inborn;g:MSH2)(dui:D009386;dis:Neoplastic Syndromes, Hereditary;g:MSH2)(dui:D004066;dis:Digestive System Diseases;g:MSH2)(dui:D005767;dis:Gastrointestina…			GO:0007050:GO:0016447:GO:0016887:GO:0006281:GO:0008584:GO:0008022:GO:0008340:GO:0003690:GO:0042771:GO:0051096:GO:0045128:GO:0003697:GO:0032405:GO:0006119:GO:0001701:GO:0030983:GO:0019724:GO:0019901:GO:0030183:GO:0006298:GO:0000784:GO:0048298:GO:0005515:GO:0019237:GO:0010224:GO:0032357:GO:0016446:GO:0010165:GO:0006301:GO:0005654:GO:0006302:GO:0043524:GO:0000287:GO:0005524:GO:0043570:GO:0032300:GO:…	609309	PF01624:PF05188:PF05192:PF00488:PF05190	1.66
	21	chr17:7579548	SNV	G	1	G/A	PASS	0.0069845752389376		316	G=271,A=45	G=0.8576,A=0.1424	14.24	0.006			TP53	NM_000546.5	TP53:exonic:NM_000546.5	missense	TCG	4	p.Pro47Ser	c.139C>T	0.13	0.009	74.0	A	AMAF=0.0152:GMAF=0.0052:EMAF=0.0	0.02		Conflicting interpretations of pathogenicity	5347105:5347104:5347103:5347102:5347101	rs1800371		(dui:ACMG59;dis:ACMG Recommendations...;g:TP53)(dui:D009369;dis:Neoplasms;g:TP53)(dui:D009370;dis:Neoplasms by Histologic Type;g:TP53)(dui:D009371;dis:Neoplasms by Site;g:TP53)(dui:D009375;dis:Neoplasms, Glandular and Epithelial;g:TP53)(dui:D002277;dis:Carcinoma;g:TP53)(dui:D004066;dis:Digestive System Diseases;g:TP53)(dui:D004067;dis:Digestive System Neoplasms;g:TP53)(dui:D000230;dis:Adenocarcin…	AZD 3355:Acetylsalicylic acid:1-(9-ethyl-9H-carbazol-3-yl)-N-methylmethanamine	AF_OTH=0.0:AF_Adj=1.718E-3:AF_AFR=1.839E-2:AF_EAS=0.0:AF_FIN=0.0:AF_SAS=6.063E-5:AF_NFE=3.001E-5:AF_AMR=1.385E-3	GO:0006284:GO:0008340:GO:0000977:GO:0008104:GO:0006289:GO:0042771:GO:0000733:GO:0048512:GO:0043621:GO:0097252:GO:0003730:GO:0005507:GO:0045892:GO:0030308:GO:0045893:GO:0046982:GO:0051087:GO:0019901:GO:0035035:GO:0019903:GO:0042826:GO:0007265:GO:0043234:GO:0006974:GO:0046902:GO:0042149:GO:0000981:GO:0001046:GO:0000990:GO:0005634:GO:0071480:GO:0005515:GO:0031625:GO:0005759:GO:0046872:GO:0051097:GO:…	191170	PF07710:PF00870	-3.39
	22	chr7:6018306	INDEL	AGTTAA	5	AGTTAA/A	PASS	2.3120647901756175E-152	1516.36	689	AGTTAA=347,A=342	AGTTAA=0.5036,A=0.4964	49.64	0.0	1		PMS2	NM_000535.7	PMS2:exonic:NM_000535.7	frameshiftDeletion	TGC	13	p.Leu731CysfsTer3	c.2191_2195delTTAAC				A						rs587781958:rs1060503110:rs553141434:rs63750695		(dui:ACMG59;dis:ACMG Recommendations...;g:PMS2)(dui:D009369;dis:Neoplasms;g:PMS2)(dui:D009371;dis:Neoplasms by Site;g:PMS2)(dui:D004066;dis:Digestive System Diseases;g:PMS2)(dui:D004067;dis:Digestive System Neoplasms;g:PMS2)(dui:D005767;dis:Gastrointestinal Diseases;g:PMS2)(dui:D005770;dis:Gastrointestinal Neoplasms;g:PMS2)(dui:D007410;dis:Intestinal Diseases;g:PMS2)(dui:D007414;dis:Intestinal Ne…	Adenosine 5'-[gamma-thio]triphosphate	AF_EAS=0.0:AF_AFR=0.0:AF_SAS=0.0;7.137E-5:AF_FIN=0.0:AF_Adj=1.098E-5;1.006E-5:AF_NFE=0.0:AF_OTH=0.0:AF_AMR=0.0;9.796E-5	GO:0016887:GO:0036464:GO:0090305:GO:0006298:GO:0005886:GO:0005654:GO:0003697:GO:0032407:GO:0003677:GO:0005524:GO:0005634:GO:0005515:GO:0004519:GO:0042493:GO:0032300:GO:0005829:GO:0032389:GO:0016446:GO:0032138	600259	PF08676:PF01119:PF02518:PF07661:PF13589	-0.22,9.23,4.22,1.32,8.74,1.22
	23	chr2:47630512	INDEL	A	1	A/AG	PASS	5.242036010084586E-49		456	A=266,AG=190	A=0.5833,AG=0.4167	41.67				MSH2	NM_000251.2	MSH2:exonic:NM_000251.2	frameshiftInsertion	GGT	1	p.Val63fs	c.187_188insG				AG				Pathogenic		rs587779113:rs63750160:rs281864942		(dui:ACMG59;dis:ACMG Recommendations...;g:MSH2)(dui:D009369;dis:Neoplasms;g:MSH2)(dui:D009371;dis:Neoplasms by Site;g:MSH2)(dui:D009358;dis:Congenital, Hereditary, and Neonatal Diseases and Abnormalities;g:MSH2)(dui:D030342;dis:Genetic Diseases, Inborn;g:MSH2)(dui:D009386;dis:Neoplastic Syndromes, Hereditary;g:MSH2)(dui:D004066;dis:Digestive System Diseases;g:MSH2)(dui:D005767;dis:Gastrointestina…		AF_OTH=0.0:AF_Adj=1.192E-5:AF_AFR=0.0:AF_EAS=0.0:AF_FIN=0.0:AF_SAS=0.0:AF_NFE=2.06E-5:AF_AMR=0.0	GO:0007050:GO:0016447:GO:0016887:GO:0006281:GO:0008584:GO:0008022:GO:0008340:GO:0003690:GO:0042771:GO:0051096:GO:0045128:GO:0003697:GO:0032405:GO:0006119:GO:0001701:GO:0030983:GO:0019724:GO:0019901:GO:0030183:GO:0006298:GO:0000784:GO:0048298:GO:0005515:GO:0019237:GO:0010224:GO:0032357:GO:0016446:GO:0010165:GO:0006301:GO:0005654:GO:0006302:GO:0043524:GO:0000287:GO:0005524:GO:0043570:GO:0032300:GO:…	609309	PF01624:PF05188:PF05192:PF00488:PF05190	5.26
	24	chr1:45796852	SNV	G	1	G/A	PASS	5.610479760324276E-221	2202.51	927	G=450,A=477	G=0.4854,A=0.5146	51.46	0.002	1		MUTYH	NM_001128425.2	MUTYH:splicesite_5:NM_001128425.2	unknown		14	p.?	c.1476+2C>T				A	GMAF=3.0E-4:AMAF=9.0E-4:EMAF=0.0			Conflicting interpretations of pathogenicity		rs864621967:rs140288388		(dui:ACMG59;dis:ACMG Recommendations...;g:MUTYH)(dui:D009369;dis:Neoplasms;g:MUTYH)(dui:D009371;dis:Neoplasms by Site;g:MUTYH)(dui:D004066;dis:Digestive System Diseases;g:MUTYH)(dui:D005767;dis:Gastrointestinal Diseases;g:MUTYH)(dui:D004067;dis:Digestive System Neoplasms;g:MUTYH)(dui:D005770;dis:Gastrointestinal Neoplasms;g:MUTYH)(dui:D009370;dis:Neoplasms by Histologic Type;g:MUTYH)(dui:D009375;…		AF_EAS=0.0:AF_AFR=1.345E-3:AF_SAS=2.422E-4:AF_FIN=0.0:AF_Adj=1.483E-4:AF_NFE=0.0:AF_OTH=0.0:AF_AMR=0.0	GO:0006281:GO:0035485:GO:0006284:GO:0000701:GO:0006298:GO:0045007:GO:0005654:GO:0032407:GO:0003677:GO:0005634:GO:0032408:GO:0032405:GO:0005515:GO:0032406:GO:0046872:GO:0005739:GO:0034039:GO:0019104:GO:0051539:GO:0032357:GO:0016798	604933	PF00633:PF14815:PF00730	2.19
	25	chr2:47693852	INDEL	CT	1	CT/C	PASS	3.5974933515572834E-219	2184.44	1098	CT=577,C=521	CT=0.5255,C=0.4745	47.45		3		MSH2	NM_000251.3	MSH2:exonic:NM_000251.3	frameshiftDeletion	GTG	10	p.Arg524ValfsTer2	c.1569delT				C		0.55			6960572	rs267607966:rs1064793561:rs63749955:rs63750224		(dui:ACMG59;dis:ACMG Recommendations...;g:MSH2)(dui:D009369;dis:Neoplasms;g:MSH2)(dui:D009371;dis:Neoplasms by Site;g:MSH2)(dui:D009358;dis:Congenital, Hereditary, and Neonatal Diseases and Abnormalities;g:MSH2)(dui:D030342;dis:Genetic Diseases, Inborn;g:MSH2)(dui:D009386;dis:Neoplastic Syndromes, Hereditary;g:MSH2)(dui:D004066;dis:Digestive System Diseases;g:MSH2)(dui:D005767;dis:Gastrointestina…			GO:0007050:GO:0016447:GO:0016887:GO:0006281:GO:0008584:GO:0008022:GO:0008340:GO:0003690:GO:0042771:GO:0051096:GO:0003697:GO:0032405:GO:0006119:GO:0001701:GO:0030983:GO:0019724:GO:0019901:GO:0030183:GO:0006298:GO:0000784:GO:0048298:GO:0005634:GO:0002204:GO:0005515:GO:0071168:GO:0019237:GO:0010224:GO:0032357:GO:0016446:GO:0010165:GO:0006301:GO:0005654:GO:0006302:GO:0043524:GO:0000287:GO:0005524:GO:…	609309	PF01624:PF05188:PF05192:PF00488:PF05190	-0.42,5.44
	26	chr17:7577539	SNV	G	1	G/A	PASS	1.853531623414693E-288	2877.32	1310	G=660,A=650	G=0.5038,A=0.4962	49.62		2		TP53	NM_000546.6	TP53:exonic:NM_000546.6	missense	TGG	7	p.Arg248Trp	c.742C>T	0.0	1.0	101.0	A		0.91:0.94:0.95		Pathogenic	10656:44920:11564:45737	rs397516437:rs1555525498:rs1555525486:rs121912651		(dui:ACMG59;dis:ACMG Recommendations...;g:TP53)(dui:D009369;dis:Neoplasms;g:TP53)(dui:D009370;dis:Neoplasms by Histologic Type;g:TP53)(dui:D009371;dis:Neoplasms by Site;g:TP53)(dui:D009375;dis:Neoplasms, Glandular and Epithelial;g:TP53)(dui:D002277;dis:Carcinoma;g:TP53)(dui:D004066;dis:Digestive System Diseases;g:TP53)(dui:D004067;dis:Digestive System Neoplasms;g:TP53)(dui:D000230;dis:Adenocarcin…	Zinc chloride:AZD 3355:Triethyl phosphate:Acetylsalicylic acid:Zinc acetate:Zinc sulfate, unspecified form:Zinc:1-(9-ethyl-9H-carbazol-3-yl)-N-methylmethanamine	AF_EAS=0.0:AF_AFR=0.0:AF_SAS=0.0:AF_FIN=0.0:AF_Adj=8.24E-6:AF_NFE=1.498E-5:AF_OTH=0.0:AF_AMR=0.0	GO:0043504:GO:0008340:GO:0000978:GO:0008104:GO:0000976:GO:0002360:GO:0006289:GO:0042771:GO:1903800:GO:0000733:GO:0048512:GO:0097371:GO:0043621:GO:0002244:GO:0097252:GO:0003730:GO:0071494:GO:0007406:GO:0005507:GO:0045892:GO:0001701:GO:0030308:GO:0045893:GO:0046982:GO:1990248:GO:0051087:GO:0034103:GO:0051402:GO:0035033:GO:0043516:GO:0019901:GO:0035035:GO:0035794:GO:0036003:GO:0019903:GO:0042826:GO:…	191170		1.45
	27	chr5:112174159	SNV	C	1	C/A	PASS	9.354056741475597E-156	1550.29	757	C=394,A=363	C=0.5205,A=0.4795	47.95		1		APC	NM_000038.6	APC:exonic:NM_000038.6	nonsense	TAA	16	p.Tyr956Ter	c.2868C>A				A		0.94:0.28			9495216:9311932			(dui:ACMG59;dis:ACMG Recommendations...;g:APC)(dui:D009369;dis:Neoplasms;g:APC)(dui:D009371;dis:Neoplasms by Site;g:APC)(dui:D009370;dis:Neoplasms by Histologic Type;g:APC)(dui:D004066;dis:Digestive System Diseases;g:APC)(dui:D004067;dis:Digestive System Neoplasms;g:APC)(dui:D009375;dis:Neoplasms, Glandular and Epithelial;g:APC)(dui:D005767;dis:Gastrointestinal Diseases;g:APC)(dui:D005770;dis:Gas…			GO:0007050:GO:0007094:GO:0016328:GO:0000776:GO:0005874:GO:0045295:GO:0045296:GO:0005829:GO:0016055:GO:0070840:GO:0001708:GO:0019887:GO:0120162:GO:0030027:GO:0032886:GO:0019901:GO:1904781:GO:0065003:GO:0031274:GO:0007026:GO:0007389:GO:0045732:GO:0005881:GO:0006974:GO:0045736:GO:0005886:GO:0005634:GO:0005912:GO:0005515:GO:0031625:GO:0051010:GO:0070830:GO:0010942:GO:0030335:GO:1990909:GO:0008286:GO:…	611731	PF05937:PF00514:PF05924:PF16630:PF16633:PF16635:PF16634:PF16689:PF11414:PF16636:PF16629:PF05972:PF05956:PF05923	0.26
