# Supplementary material for: Genetic insights: High germline variant rate in an indigenous African cohort with early-onset colorectal cancer
Source: Front Oncol. 2023 Oct 27;13:1253867. doi: 10.3389/fonc.2023.1253867 (PMC10642181; doi:10.3389/fonc.2023.1253867)
Supplement: Supplementary file 6 [file Table_3.xlsx]

## Sheet: Sheet1
Supplementary Material
Genetic insights: High germline variant rate in an indigenous African cohort with early-onset colorectal cancer
Safiye Yildiz, Takudzwa N. Musarurwa, Ursula Algar, Ramadhani Chambuso, George Rebello, Paul A. Goldberg, and Raj Ramesar*.
* Correspondence: Raj Ramesar: raj.ramesar@uct.ac.za
Supplementary Table 3

## Sheet: UniqueExonicVUSs
List of Variants of Uncertain Significance in exonic regions in the 14-gene panel
# locus	type	ref	length	genotype	filter	pvalue	coverage	allele_coverage	allele_ratio	%_frequency	maf	gene	transcript	location	function	codon	exon	protein	coding	sift	polyphen	grantham	normalizedAlt	5000Exomes	FATHMM	NamedVariants	clinvar	cosmic	dbsnp	dgv	dra	drugbank	exac	go	omim	pfam	phylop	MyVariantDefaultDb_hg19
chr2:48023135	SNV	A	1	A/G	PASS	1.2589254117941507e-116	559	A=290,G=269	A=0.5188,G=0.4812	48.12	NA	MSH6	NM_000179.3	MSH6:exonic:NM_000179.3	missense	AGG	3	p.Lys187Arg	c.560A>G	0.61	0.127	26.0	G	NA	0.76	NA	Uncertain significance	33663	rs1553411459	NA	(dui:ACMG59;dis:ACMG Recommendations...;g:MSH6)(dui:D009369;dis:Neoplasms;g:MSH6)(dui:D009371;dis:Neoplasms by Site;g:MSH6)(dui:D009358;dis:Congenital, Hereditary, and Neonatal Diseases and Abnormalities;g:MSH6)(dui:D030342;dis:Genetic Diseases, Inborn;g:MSH6)(dui:D009386;dis:Neoplastic Syndromes, Hereditary;g:MSH6)(dui:D004066;dis:Digestive System Diseases;g:MSH6)(dui:D004067;dis:Digestive Syste…	NA	NA	GO:0016447:GO:0016887:GO:0006281:GO:0008340:GO:0035064:GO:0036297:GO:0003690:GO:0051096:GO:0005794:GO:0009411:GO:0097193:GO:0000710:GO:0005654:GO:0000287:GO:0005524:GO:0032405:GO:0043570:GO:0043231:GO:0016032:GO:0032300:GO:0005829:GO:0032301:GO:0030983:GO:0045190:GO:0008094:GO:0006290:GO:0042803:GO:0032142:GO:0032143:GO:0008630:GO:0003682:GO:0006298:GO:0043531:GO:0000400:GO:0045910:GO:0005634:GO:…	600678	PF01624:PF00855:PF05188:PF05192:PF00488:PF05190	3.47	NA
chr12:133257855	SNV	C	1	C/T	PASS	2.0849709101237405e-69	304	C=152,T=152	C=0.5,T=0.5	50.00	NA	POLE	NM_006231.4	POLE:exonic:NM_006231.4	missense	ACC	2	p.Ala25Thr	c.73G>A	0.42	0.002	58.0	T	NA	0.23	NA	Uncertain significance	937344	rs773204331	NA	(dui:D009369;dis:Neoplasms;g:POLE)(dui:D009371;dis:Neoplasms by Site;g:POLE)(dui:D004066;dis:Digestive System Diseases;g:POLE)(dui:D004067;dis:Digestive System Neoplasms;g:POLE)(dui:D005767;dis:Gastrointestinal Diseases;g:POLE)(dui:D005770;dis:Gastrointestinal Neoplasms;g:POLE)(dui:D007410;dis:Intestinal Diseases;g:POLE)(dui:D003108;dis:Colonic Diseases;g:POLE)(dui:D007414;dis:Intestinal Neoplasm…	Cladribine	AF_EAS=0.0:AF_AFR=0.0:AF_SAS=6.058E-5:AF_FIN=0.0:AF_Adj=2.474E-5:AF_NFE=3E-5:AF_OTH=0.0:AF_AMR=0.0	GO:0006270:GO:0090305:GO:0008270:GO:0006260:GO:0006272:GO:0006297:GO:0048568:GO:0003682:GO:0006287:GO:0008310:GO:0045004:GO:0000731:GO:0000278:GO:0005886:GO:0005654:GO:0008622:GO:0000166:GO:0003677:GO:0005634:GO:0003887:GO:0005515:GO:0000082:GO:0032201:GO:0051539	174762	PF13482:PF08490:PF10108:PF03104:PF00136	-0.46	NA
chr12:133219285	SNV	C	1	C/T	PASS	5.413772478826861e-47	154	C=66,T=88	C=0.4286,T=0.5714	57.14	NA	POLE	NM_006231.4	POLE:exonic:NM_006231.4	missense	ATT	37	p.Val1587Ile	c.4759G>A	0.34	0.0	29.0	T	GMAF=1.0E-4:AMAF=2.0E-4:EMAF=0.0	NA	NA	Uncertain significance	NA	rs372388555	NA	(dui:D009369;dis:Neoplasms;g:POLE)(dui:D009371;dis:Neoplasms by Site;g:POLE)(dui:D004066;dis:Digestive System Diseases;g:POLE)(dui:D004067;dis:Digestive System Neoplasms;g:POLE)(dui:D005767;dis:Gastrointestinal Diseases;g:POLE)(dui:D005770;dis:Gastrointestinal Neoplasms;g:POLE)(dui:D007410;dis:Intestinal Diseases;g:POLE)(dui:D003108;dis:Colonic Diseases;g:POLE)(dui:D007414;dis:Intestinal Neoplasm…	Cladribine	AF_EAS=0.0:AF_AFR=1.942E-4:AF_SAS=0.0:AF_FIN=0.0:AF_Adj=1.652E-5:AF_NFE=0.0:AF_OTH=0.0:AF_AMR=0.0	GO:0006270:GO:0090305:GO:0008270:GO:0006260:GO:0006272:GO:0006297:GO:0048568:GO:0003682:GO:0006287:GO:0008310:GO:0045004:GO:0000731:GO:0000278:GO:0005886:GO:0005654:GO:0008622:GO:0000166:GO:0003677:GO:0005634:GO:0003887:GO:0005515:GO:0000082:GO:0032201:GO:0051539	174762	PF13482:PF08490:PF10108:PF03104:PF00136	1.46	NA
chr12:133225520	SNV	G	1	G/A	PASS	1.0185913880541066e-123	563	G=285,A=278	G=0.5062,A=0.4938	49.38	NA	POLE	NM_006231.4	POLE:exonic:NM_006231.4	missense	TGC	32	p.Arg1382Cys	c.4144C>T	0.0	0.994	180.0	A	NA	0.95	NA	Uncertain significance	3458337	rs5744904	NA	(dui:D009369;dis:Neoplasms;g:POLE)(dui:D009371;dis:Neoplasms by Site;g:POLE)(dui:D004066;dis:Digestive System Diseases;g:POLE)(dui:D004067;dis:Digestive System Neoplasms;g:POLE)(dui:D005767;dis:Gastrointestinal Diseases;g:POLE)(dui:D005770;dis:Gastrointestinal Neoplasms;g:POLE)(dui:D007410;dis:Intestinal Diseases;g:POLE)(dui:D003108;dis:Colonic Diseases;g:POLE)(dui:D007414;dis:Intestinal Neoplasm…	Cladribine	NA	GO:0006270:GO:0090305:GO:0008270:GO:0006260:GO:0006272:GO:0006297:GO:0048568:GO:0003682:GO:0006287:GO:0008310:GO:0045004:GO:0000731:GO:0000278:GO:0005886:GO:0005654:GO:0008622:GO:0000166:GO:0003677:GO:0005634:GO:0003887:GO:0005515:GO:0000082:GO:0032201:GO:0051539	174762	PF13482:PF08490:PF10108:PF03104:PF00136	3.11	NA
chr12:133225996	SNV	C	1	C/T	PASS	2.583449639258471e-75	299	C=142,T=157	C=0.4749,T=0.5251	52.51	NA	POLE	NM_006231.4	POLE:exonic:NM_006231.4	missense	ATG	31	p.Val1301Met	c.3901G>A	0.11	0.001	21.0	T	NA	NA	NA	Uncertain significance	NA	rs112098447	NA	(dui:D009369;dis:Neoplasms;g:POLE)(dui:D009371;dis:Neoplasms by Site;g:POLE)(dui:D004066;dis:Digestive System Diseases;g:POLE)(dui:D004067;dis:Digestive System Neoplasms;g:POLE)(dui:D005767;dis:Gastrointestinal Diseases;g:POLE)(dui:D005770;dis:Gastrointestinal Neoplasms;g:POLE)(dui:D007410;dis:Intestinal Diseases;g:POLE)(dui:D003108;dis:Colonic Diseases;g:POLE)(dui:D007414;dis:Intestinal Neoplasm…	Cladribine	NA	GO:0006270:GO:0090305:GO:0008270:GO:0006260:GO:0006272:GO:0006297:GO:0048568:GO:0003682:GO:0006287:GO:0008310:GO:0045004:GO:0000731:GO:0000278:GO:0005886:GO:0005654:GO:0008622:GO:0000166:GO:0003677:GO:0005634:GO:0003887:GO:0005515:GO:0000082:GO:0032201:GO:0051539	174762	PF13482:PF08490:PF10108:PF03104:PF00136	0.46	NA
chr10:88649936	SNV	A	1	A/G	PASS	3.4514373933586494e-143	552	A=257,G=295	A=0.4656,G=0.5344	53.44	NA	BMPR1A	NM_004329.3	BMPR1A:exonic:NM_004329.3	missense	TGT	4	p.Tyr62Cys	c.185A>G	0.0	0.952	194.0	G	NA	NA	NA	Uncertain significance	NA	rs1060503402	NA	(dui:ACMG59;dis:ACMG Recommendations...;g:BMPR1A)(dui:D009358;dis:Congenital, Hereditary, and Neonatal Diseases and Abnormalities;g:BMPR1A)(dui:D009369;dis:Neoplasms;g:BMPR1A)(dui:D009386;dis:Neoplastic Syndromes, Hereditary;g:BMPR1A)(dui:D030342;dis:Genetic Diseases, Inborn;g:BMPR1A)(dui:D004066;dis:Digestive System Diseases;g:BMPR1A)(dui:D005767;dis:Gastrointestinal Diseases;g:BMPR1A)(dui:D0074…	Dibotermin alfa	NA	GO:0060045:GO:0060043:GO:0007179:GO:0009950:GO:1904414:GO:0021998:GO:0043025:GO:0009953:GO:0042733:GO:0003203:GO:0030425:GO:0005901:GO:0006955:GO:0048368:GO:0001701:GO:0071773:GO:0030509:GO:0035912:GO:0001707:GO:0050679:GO:0030501:GO:0019827:GO:0014032:GO:0003183:GO:0002053:GO:0003186:GO:0043235:GO:0048568:GO:0004674:GO:0001880:GO:0003222:GO:0003223:GO:0005886:GO:0000981:GO:0004675:GO:0021983:GO:…	601299	PF01064:PF00069:PF07714:PF08515	8.57	NA
chr12:133252696	SNV	A	1	A/C	PASS	5.62341325190349e-213	989	A=504,C=485	A=0.5096,C=0.4904	49.04	NA	POLE	NM_006231.4	POLE:exonic:NM_006231.4	missense	TGC	10	p.Phe335Cys	c.1004T>G	0.0	0.999	205.0	C	NA	NA	NA	Uncertain significance	NA	rs1593078268	NA	(dui:D009369;dis:Neoplasms;g:POLE)(dui:D009371;dis:Neoplasms by Site;g:POLE)(dui:D004066;dis:Digestive System Diseases;g:POLE)(dui:D004067;dis:Digestive System Neoplasms;g:POLE)(dui:D005767;dis:Gastrointestinal Diseases;g:POLE)(dui:D005770;dis:Gastrointestinal Neoplasms;g:POLE)(dui:D007410;dis:Intestinal Diseases;g:POLE)(dui:D003108;dis:Colonic Diseases;g:POLE)(dui:D007414;dis:Intestinal Neoplasm…	Cladribine	NA	GO:0006270:GO:0090305:GO:0008270:GO:0006260:GO:0006272:GO:0006297:GO:0048568:GO:0003682:GO:0006287:GO:0008310:GO:0045004:GO:0000731:GO:0000278:GO:0005886:GO:0005654:GO:0008622:GO:0000166:GO:0003677:GO:0005634:GO:0003887:GO:0005515:GO:0000082:GO:0032201:GO:0051539	174762	PF13482:PF08490:PF10108:PF03104:PF00136	9.24	NA
chr12:133219285	SNV	C	1	C/T	PASS	3.3113112148259888e-108	420	C=197,T=223	C=0.469,T=0.531	53.10	NA	POLE	NM_006231.4	POLE:exonic:NM_006231.4	missense	ATT	37	p.Val1587Ile	c.4759G>A	0.34	0.0	29.0	T	GMAF=1.0E-4:AMAF=2.0E-4:EMAF=0.0	NA	NA	Uncertain significance	NA	rs372388555	NA	(dui:D009369;dis:Neoplasms;g:POLE)(dui:D009371;dis:Neoplasms by Site;g:POLE)(dui:D004066;dis:Digestive System Diseases;g:POLE)(dui:D004067;dis:Digestive System Neoplasms;g:POLE)(dui:D005767;dis:Gastrointestinal Diseases;g:POLE)(dui:D005770;dis:Gastrointestinal Neoplasms;g:POLE)(dui:D007410;dis:Intestinal Diseases;g:POLE)(dui:D003108;dis:Colonic Diseases;g:POLE)(dui:D007414;dis:Intestinal Neoplasm…	Cladribine	AF_EAS=0.0:AF_AFR=1.942E-4:AF_SAS=0.0:AF_FIN=0.0:AF_Adj=1.652E-5:AF_NFE=0.0:AF_OTH=0.0:AF_AMR=0.0	GO:0006270:GO:0090305:GO:0008270:GO:0006260:GO:0006272:GO:0006297:GO:0048568:GO:0003682:GO:0006287:GO:0008310:GO:0045004:GO:0000731:GO:0000278:GO:0005886:GO:0005654:GO:0008622:GO:0000166:GO:0003677:GO:0005634:GO:0003887:GO:0005515:GO:0000082:GO:0032201:GO:0051539	174762	PF13482:PF08490:PF10108:PF03104:PF00136	1.46	NA
chr2:47630487	SNV	G	1	G/T	PASS	9.682778562612267e-128	601	G=309,T=292	G=0.5141,T=0.4859	48.59	NA	MSH2	NM_000251.3	MSH2:exonic:NM_000251.3	missense	TCC	1	p.Ala53Ser	c.157G>T	0.0	0.999	99.0	T	NA	NA	NA	Uncertain significance	NA	rs755931648	NA	(dui:ACMG59;dis:ACMG Recommendations...;g:MSH2)(dui:D009369;dis:Neoplasms;g:MSH2)(dui:D009371;dis:Neoplasms by Site;g:MSH2)(dui:D009358;dis:Congenital, Hereditary, and Neonatal Diseases and Abnormalities;g:MSH2)(dui:D030342;dis:Genetic Diseases, Inborn;g:MSH2)(dui:D009386;dis:Neoplastic Syndromes, Hereditary;g:MSH2)(dui:D004066;dis:Digestive System Diseases;g:MSH2)(dui:D005767;dis:Gastrointestina…	NA	AF_EAS=0.0:AF_AFR=3.206E-4:AF_SAS=0.0:AF_FIN=0.0:AF_Adj=3.716E-5:AF_NFE=0.0:AF_OTH=1.859E-3:AF_AMR=0.0	GO:0007050:GO:0016447:GO:0016887:GO:0006281:GO:0008584:GO:0008022:GO:0008340:GO:0003690:GO:0042771:GO:0051096:GO:0003697:GO:0032405:GO:0006119:GO:0001701:GO:0030983:GO:0019724:GO:0019901:GO:0030183:GO:0006298:GO:0000784:GO:0048298:GO:0005634:GO:0002204:GO:0005515:GO:0071168:GO:0019237:GO:0010224:GO:0032357:GO:0016446:GO:0010165:GO:0006301:GO:0005654:GO:0006302:GO:0043524:GO:0000287:GO:0005524:GO:…	609309	PF01624:PF05188:PF05192:PF00488:PF05190	7.15	NA
chr2:47637374	SNV	C	1	C/G	PASS	3.190068435975199e-87	471	C=257,G=214	C=0.5456,G=0.4544	45.44	NA	MSH2	NM_000251.3	MSH2:exonic:NM_000251.3	missense	GAG	3	p.Gln170Glu	c.508C>G	1.0	0.002	29.0	G	GMAF=1.0E-4:AMAF=2.0E-4:EMAF=0.0	0.97	NA	Uncertain significance	8820322	rs63750843	NA	(dui:ACMG59;dis:ACMG Recommendations...;g:MSH2)(dui:D009369;dis:Neoplasms;g:MSH2)(dui:D009371;dis:Neoplasms by Site;g:MSH2)(dui:D009358;dis:Congenital, Hereditary, and Neonatal Diseases and Abnormalities;g:MSH2)(dui:D030342;dis:Genetic Diseases, Inborn;g:MSH2)(dui:D009386;dis:Neoplastic Syndromes, Hereditary;g:MSH2)(dui:D004066;dis:Digestive System Diseases;g:MSH2)(dui:D005767;dis:Gastrointestina…	NA	AF_EAS=0.0:AF_AFR=2.883E-4:AF_SAS=0.0:AF_FIN=0.0:AF_Adj=2.471E-5:AF_NFE=0.0:AF_OTH=0.0:AF_AMR=0.0	GO:0007050:GO:0016447:GO:0016887:GO:0006281:GO:0008584:GO:0008022:GO:0008340:GO:0003690:GO:0042771:GO:0051096:GO:0003697:GO:0032405:GO:0006119:GO:0001701:GO:0030983:GO:0019724:GO:0019901:GO:0030183:GO:0006298:GO:0000784:GO:0048298:GO:0005634:GO:0002204:GO:0005515:GO:0071168:GO:0019237:GO:0010224:GO:0032357:GO:0016446:GO:0010165:GO:0006301:GO:0005654:GO:0006302:GO:0043524:GO:0000287:GO:0005524:GO:…	609309	PF01624:PF05188:PF05192:PF00488:PF05190	4.8	NA
chr7:6031668	SNV	C	1	C/G	PASS	5.610479760324643e-119	549	C=280,G=269	C=0.51,G=0.49	49.00	0.0	PMS2	NM_000535.7	PMS2:exonic:NM_000535.7	missense	GAC	9	p.Glu308Asp	c.924G>C	0.0	0.268	45.0	G	NA	NA	NA	Uncertain significance	NA	rs114185660:rs1554299430	NA	(dui:ACMG59;dis:ACMG Recommendations...;g:PMS2)(dui:D009369;dis:Neoplasms;g:PMS2)(dui:D009371;dis:Neoplasms by Site;g:PMS2)(dui:D004066;dis:Digestive System Diseases;g:PMS2)(dui:D004067;dis:Digestive System Neoplasms;g:PMS2)(dui:D005767;dis:Gastrointestinal Diseases;g:PMS2)(dui:D005770;dis:Gastrointestinal Neoplasms;g:PMS2)(dui:D007410;dis:Intestinal Diseases;g:PMS2)(dui:D007414;dis:Intestinal Ne…	Adenosine 5'-[gamma-thio]triphosphate	AF_EAS=0.0:AF_AFR=9.714E-5:AF_SAS=6.1E-5:AF_FIN=0.0:AF_Adj=2.494E-5:AF_NFE=1.513E-5:AF_OTH=0.0:AF_AMR=0.0	GO:0016887:GO:0036464:GO:0090305:GO:0006298:GO:0005886:GO:0005654:GO:0003697:GO:0032407:GO:0003677:GO:0005524:GO:0005634:GO:0005515:GO:0004519:GO:0042493:GO:0032300:GO:0005829:GO:0032389:GO:0016446:GO:0032138	600259	PF08676:PF01119:PF02518:PF07661:PF13589	1.93	NA
chr7:6031668	SNV	C	1	C/G	PASS	3.2809529311313376e-160	693	C=342,G=351	C=0.4935,G=0.5065	50.65	0.0	PMS2	NM_000535.7	PMS2:exonic:NM_000535.7	missense	GAC	9	p.Glu308Asp	c.924G>C	0.0	0.268	45.0	G	NA	NA	NA	Uncertain significance	NA	rs114185660:rs1554299430	NA	(dui:ACMG59;dis:ACMG Recommendations...;g:PMS2)(dui:D009369;dis:Neoplasms;g:PMS2)(dui:D009371;dis:Neoplasms by Site;g:PMS2)(dui:D004066;dis:Digestive System Diseases;g:PMS2)(dui:D004067;dis:Digestive System Neoplasms;g:PMS2)(dui:D005767;dis:Gastrointestinal Diseases;g:PMS2)(dui:D005770;dis:Gastrointestinal Neoplasms;g:PMS2)(dui:D007410;dis:Intestinal Diseases;g:PMS2)(dui:D007414;dis:Intestinal Ne…	Adenosine 5'-[gamma-thio]triphosphate	AF_EAS=0.0:AF_AFR=9.714E-5:AF_SAS=6.1E-5:AF_FIN=0.0:AF_Adj=2.494E-5:AF_NFE=1.513E-5:AF_OTH=0.0:AF_AMR=0.0	GO:0016887:GO:0036464:GO:0090305:GO:0006298:GO:0005886:GO:0005654:GO:0003697:GO:0032407:GO:0003677:GO:0005524:GO:0005634:GO:0005515:GO:0004519:GO:0042493:GO:0032300:GO:0005829:GO:0032389:GO:0016446:GO:0032138	600259	PF08676:PF01119:PF02518:PF07661:PF13589	1.93	NA
chr2:48023135	SNV	A	1	A/G	PASS	4.8865235934285765e-148	666	A=335,G=331	A=0.503,G=0.497	49.70	NA	MSH6	NM_000179.3	MSH6:exonic:NM_000179.3	missense	AGG	3	p.Lys187Arg	c.560A>G	0.61	0.127	26.0	G	NA	0.76	NA	Uncertain significance	33663	rs1553411459	NA	(dui:ACMG59;dis:ACMG Recommendations...;g:MSH6)(dui:D009369;dis:Neoplasms;g:MSH6)(dui:D009371;dis:Neoplasms by Site;g:MSH6)(dui:D009358;dis:Congenital, Hereditary, and Neonatal Diseases and Abnormalities;g:MSH6)(dui:D030342;dis:Genetic Diseases, Inborn;g:MSH6)(dui:D009386;dis:Neoplastic Syndromes, Hereditary;g:MSH6)(dui:D004066;dis:Digestive System Diseases;g:MSH6)(dui:D004067;dis:Digestive Syste…	NA	NA	GO:0016447:GO:0016887:GO:0006281:GO:0008340:GO:0035064:GO:0036297:GO:0003690:GO:0051096:GO:0005794:GO:0009411:GO:0097193:GO:0000710:GO:0005654:GO:0000287:GO:0005524:GO:0032405:GO:0043570:GO:0043231:GO:0016032:GO:0032300:GO:0005829:GO:0032301:GO:0030983:GO:0045190:GO:0008094:GO:0006290:GO:0042803:GO:0032142:GO:0032143:GO:0008630:GO:0003682:GO:0006298:GO:0043531:GO:0000400:GO:0045910:GO:0005634:GO:…	600678	PF01624:PF00855:PF05188:PF05192:PF00488:PF05190	3.47	NA
chr2:48023135	SNV	A	1	A/G	PASS	2.0183663636815926e-158	627	A=296,G=331	A=0.4721,G=0.5279	52.79	NA	MSH6	NM_000179.3	MSH6:exonic:NM_000179.3	missense	AGG	3	p.Lys187Arg	c.560A>G	0.61	0.127	26.0	G	NA	0.76	NA	Uncertain significance	33663	rs1553411459	NA	(dui:ACMG59;dis:ACMG Recommendations...;g:MSH6)(dui:D009369;dis:Neoplasms;g:MSH6)(dui:D009371;dis:Neoplasms by Site;g:MSH6)(dui:D009358;dis:Congenital, Hereditary, and Neonatal Diseases and Abnormalities;g:MSH6)(dui:D030342;dis:Genetic Diseases, Inborn;g:MSH6)(dui:D009386;dis:Neoplastic Syndromes, Hereditary;g:MSH6)(dui:D004066;dis:Digestive System Diseases;g:MSH6)(dui:D004067;dis:Digestive Syste…	NA	NA	GO:0016447:GO:0016887:GO:0006281:GO:0008340:GO:0035064:GO:0036297:GO:0003690:GO:0051096:GO:0005794:GO:0009411:GO:0097193:GO:0000710:GO:0005654:GO:0000287:GO:0005524:GO:0032405:GO:0043570:GO:0043231:GO:0016032:GO:0032300:GO:0005829:GO:0032301:GO:0030983:GO:0045190:GO:0008094:GO:0006290:GO:0042803:GO:0032142:GO:0032143:GO:0008630:GO:0003682:GO:0006298:GO:0043531:GO:0000400:GO:0045910:GO:0005634:GO:…	600678	PF01624:PF00855:PF05188:PF05192:PF00488:PF05190	3.47	NA
chr12:133257855	SNV	C	1	C/T	PASS	6.471426157485724e-121	563	C=288,T=275	C=0.5115,T=0.4885	48.85	NA	POLE	NM_006231.4	POLE:exonic:NM_006231.4	missense	ACC	2	p.Ala25Thr	c.73G>A	0.42	0.002	58.0	T	NA	0.23	NA	Uncertain significance	937344	rs773204331	NA	(dui:D009369;dis:Neoplasms;g:POLE)(dui:D009371;dis:Neoplasms by Site;g:POLE)(dui:D004066;dis:Digestive System Diseases;g:POLE)(dui:D004067;dis:Digestive System Neoplasms;g:POLE)(dui:D005767;dis:Gastrointestinal Diseases;g:POLE)(dui:D005770;dis:Gastrointestinal Neoplasms;g:POLE)(dui:D007410;dis:Intestinal Diseases;g:POLE)(dui:D003108;dis:Colonic Diseases;g:POLE)(dui:D007414;dis:Intestinal Neoplasm…	Cladribine	AF_EAS=0.0:AF_AFR=0.0:AF_SAS=6.058E-5:AF_FIN=0.0:AF_Adj=2.474E-5:AF_NFE=3E-5:AF_OTH=0.0:AF_AMR=0.0	GO:0006270:GO:0090305:GO:0008270:GO:0006260:GO:0006272:GO:0006297:GO:0048568:GO:0003682:GO:0006287:GO:0008310:GO:0045004:GO:0000731:GO:0000278:GO:0005886:GO:0005654:GO:0008622:GO:0000166:GO:0003677:GO:0005634:GO:0003887:GO:0005515:GO:0000082:GO:0032201:GO:0051539	174762	PF13482:PF08490:PF10108:PF03104:PF00136	-0.46	NA
chr5:112176329	SNV	C	1	C/G	PASS	1.6292960326396815e-247	1202	C=624,G=578	C=0.5191,G=0.4809	48.09	NA	APC	NM_000038.6	APC:exonic:NM_000038.6	missense	GAG	16	p.Gln1680Glu	c.5038C>G	0.6	0.0	29.0	G	NA	0.5	NA	Uncertain significance	6918453	rs754122018	NA	(dui:ACMG59;dis:ACMG Recommendations...;g:APC)(dui:D009369;dis:Neoplasms;g:APC)(dui:D009371;dis:Neoplasms by Site;g:APC)(dui:D009370;dis:Neoplasms by Histologic Type;g:APC)(dui:D004066;dis:Digestive System Diseases;g:APC)(dui:D004067;dis:Digestive System Neoplasms;g:APC)(dui:D009375;dis:Neoplasms, Glandular and Epithelial;g:APC)(dui:D005767;dis:Gastrointestinal Diseases;g:APC)(dui:D005770;dis:Gas…	NA	AF_EAS=0.0:AF_AFR=0.0:AF_SAS=0.0:AF_FIN=0.0:AF_Adj=8.299E-6:AF_NFE=0.0:AF_OTH=0.0:AF_AMR=8.717E-5	GO:0007050:GO:0007094:GO:0016328:GO:0000776:GO:0005874:GO:0045295:GO:0045296:GO:0005829:GO:0016055:GO:0070840:GO:0001708:GO:0019887:GO:0120162:GO:0030027:GO:0032886:GO:0019901:GO:1904781:GO:0065003:GO:0031274:GO:0007026:GO:0007389:GO:0045732:GO:0005881:GO:0006974:GO:0045736:GO:0005886:GO:0005634:GO:0005912:GO:0005515:GO:0031625:GO:0051010:GO:0070830:GO:0010942:GO:0030335:GO:1990909:GO:0008286:GO:…	611731	PF05937:PF00514:PF05924:PF16630:PF16633:PF16635:PF16634:PF16689:PF11414:PF16636:PF16629:PF05972:PF05956:PF05923	0.85	NA
chr12:133252696	SNV	A	1	A/C	PASS	1.0069316688519031e-281	1180	A=572,C=608	A=0.4847,C=0.5153	51.53	NA	POLE	NM_006231.4	POLE:exonic:NM_006231.4	missense	TGC	10	p.Phe335Cys	c.1004T>G	0.0	0.999	205.0	C	NA	NA	NA	Uncertain significance	NA	rs1593078268	NA	(dui:D009369;dis:Neoplasms;g:POLE)(dui:D009371;dis:Neoplasms by Site;g:POLE)(dui:D004066;dis:Digestive System Diseases;g:POLE)(dui:D004067;dis:Digestive System Neoplasms;g:POLE)(dui:D005767;dis:Gastrointestinal Diseases;g:POLE)(dui:D005770;dis:Gastrointestinal Neoplasms;g:POLE)(dui:D007410;dis:Intestinal Diseases;g:POLE)(dui:D003108;dis:Colonic Diseases;g:POLE)(dui:D007414;dis:Intestinal Neoplasm…	Cladribine	NA	GO:0006270:GO:0090305:GO:0008270:GO:0006260:GO:0006272:GO:0006297:GO:0048568:GO:0003682:GO:0006287:GO:0008310:GO:0045004:GO:0000731:GO:0000278:GO:0005886:GO:0005654:GO:0008622:GO:0000166:GO:0003677:GO:0005634:GO:0003887:GO:0005515:GO:0000082:GO:0032201:GO:0051539	174762	PF13482:PF08490:PF10108:PF03104:PF00136	9.24	NA
chr12:133225540	SNV	G	1	G/A	PASS	1.2473835142429535e-182	931	G=494,A=437	G=0.5306,A=0.4694	46.94	NA	POLE	NM_006231.3	POLE:exonic:NM_006231.3	missense	GTG	32	p.Ala1375Val	c.4124C>T	0.09	0.002	64.0	A	NA	0.86	NA	Uncertain significance	2001639:2001640	rs766168647	NA	(dui:D009369;dis:Neoplasms;g:POLE)(dui:D009371;dis:Neoplasms by Site;g:POLE)(dui:D004066;dis:Digestive System Diseases;g:POLE)(dui:D004067;dis:Digestive System Neoplasms;g:POLE)(dui:D005767;dis:Gastrointestinal Diseases;g:POLE)(dui:D005770;dis:Gastrointestinal Neoplasms;g:POLE)(dui:D007410;dis:Intestinal Diseases;g:POLE)(dui:D003108;dis:Colonic Diseases;g:POLE)(dui:D007414;dis:Intestinal Neoplasm…	Cladribine	AF_OTH=0.0:AF_Adj=2.489E-5:AF_AFR=0.0:AF_EAS=0.0:AF_FIN=0.0:AF_SAS=1.852E-4:AF_NFE=0.0:AF_AMR=0.0	GO:0006281:GO:0006260:GO:0006287:GO:0045004:GO:0000731:GO:0005654:GO:0008622:GO:0000166:GO:0003887:GO:0000082:GO:0032201:GO:0071897:GO:0006270:GO:0090305:GO:0008270:GO:0006272:GO:0006297:GO:0048568:GO:0003682:GO:0008310:GO:0005886:GO:0003677:GO:0005634:GO:0008408:GO:0005515:GO:0051539	NA	PF13482:PF08490:PF10108:PF03104:PF00136	2.57	NA
chr7:6031668	SNV	C	1	C/G	PASS	5.116818355403115e-147	655	C=328,G=327	C=0.5008,G=0.4992	49.92	0.0	PMS2	NM_000535.6	PMS2:exonic:NM_000535.6	missense	GAC	9	p.Glu308Asp	c.924G>C	0.0	0.268	45.0	G	NA	NA	NA	Uncertain significance	NA	rs114185660	NA	(dui:ACMG59;dis:ACMG Recommendations...;g:PMS2)(dui:D009369;dis:Neoplasms;g:PMS2)(dui:D009371;dis:Neoplasms by Site;g:PMS2)(dui:D004066;dis:Digestive System Diseases;g:PMS2)(dui:D004067;dis:Digestive System Neoplasms;g:PMS2)(dui:D005767;dis:Gastrointestinal Diseases;g:PMS2)(dui:D005770;dis:Gastrointestinal Neoplasms;g:PMS2)(dui:D007410;dis:Intestinal Diseases;g:PMS2)(dui:D007414;dis:Intestinal Ne…	Adenosine 5'-[Œ≥-thio]triphosphate	AF_OTH=0.0:AF_Adj=2.494E-5:AF_AFR=9.714E-5:AF_EAS=0.0:AF_FIN=0.0:AF_SAS=6.1E-5:AF_NFE=1.513E-5:AF_AMR=0.0	GO:0016887:GO:0036464:GO:0090305:GO:0015630:GO:0006298:GO:0005886:GO:0005654:GO:0003697:GO:0032407:GO:0003677:GO:0005524:GO:0005634:GO:0005515:GO:0004519:GO:0042493:GO:0005829:GO:0032389:GO:0030983:GO:0016446:GO:0032138	600259	PF01119:PF08676:PF02518:PF07661:PF13589	1.93	NA
chr12:133257855	SNV	C	1	C/T	PASS	1.8535316234148141e-159	696	C=345,T=351	C=0.4957,T=0.5043	50.43	NA	POLE	NM_006231.3	POLE:exonic:NM_006231.3	missense	ACC	2	p.Ala25Thr	c.73G>A	0.43	0.002	58.0	T	NA	0.23	NA	Uncertain significance	937344:937345	rs773204331	NA	(dui:D009369;dis:Neoplasms;g:POLE)(dui:D009371;dis:Neoplasms by Site;g:POLE)(dui:D004066;dis:Digestive System Diseases;g:POLE)(dui:D004067;dis:Digestive System Neoplasms;g:POLE)(dui:D005767;dis:Gastrointestinal Diseases;g:POLE)(dui:D005770;dis:Gastrointestinal Neoplasms;g:POLE)(dui:D007410;dis:Intestinal Diseases;g:POLE)(dui:D003108;dis:Colonic Diseases;g:POLE)(dui:D007414;dis:Intestinal Neoplasm…	Cladribine	AF_OTH=0.0:AF_Adj=2.474E-5:AF_AFR=0.0:AF_EAS=0.0:AF_FIN=0.0:AF_SAS=6.058E-5:AF_NFE=3E-5:AF_AMR=0.0	GO:0006281:GO:0006260:GO:0006287:GO:0045004:GO:0000731:GO:0005654:GO:0008622:GO:0000166:GO:0003887:GO:0000082:GO:0032201:GO:0071897:GO:0006270:GO:0090305:GO:0008270:GO:0006272:GO:0006297:GO:0048568:GO:0003682:GO:0008310:GO:0005886:GO:0003677:GO:0005634:GO:0008408:GO:0005515:GO:0051539	NA	PF13482:PF08490:PF10108:PF03104:PF00136	-0.46	NA
chr3:37061929	SNV	A	1	A/G	PASS	2.0758692704951962e-53	263	A=139,G=124	A=0.5285,G=0.4715	47.15	0	MLH1	NM_000249.3	MLH1:exonic:NM_000249.3	missense	AGT	11	p.Asn338Ser	c.1013A>G	0.2	0.506	46.0	G	AMAF=0.0:GMAF=1.0E-4:EMAF=1.0E-4	NA	NA	Uncertain significance	NA	rs63751467	NA	(dui:ACMG59;dis:ACMG Recommendations...;g:MLH1)(dui:D009369;dis:Neoplasms;g:MLH1)(dui:D009371;dis:Neoplasms by Site;g:MLH1)(dui:D009358;dis:Congenital, Hereditary, and Neonatal Diseases and Abnormalities;g:MLH1)(dui:D030342;dis:Genetic Diseases, Inborn;g:MLH1)(dui:D009386;dis:Neoplastic Syndromes, Hereditary;g:MLH1)(dui:D003123;dis:Colorectal Neoplasms, Hereditary Nonpolyposis;g:MLH1)(dui:D004066…	NA	AF_OTH=0.0:AF_Adj=5.786E-5:AF_AFR=0.0:AF_EAS=0.0:AF_FIN=0.0:AF_SAS=6.067E-5:AF_NFE=9.02E-5:AF_AMR=0.0	GO:0016887:GO:0000712:GO:0006303:GO:0000795:GO:0001673:GO:0005654:GO:0003697:GO:0032407:GO:0005524:GO:0032300:GO:0032389:GO:0030983:GO:0045190:GO:0007060:GO:0007283:GO:0008630:GO:0048304:GO:0003682:GO:0006298:GO:0045950:GO:0007129:GO:0000289:GO:0005712:GO:0043060:GO:0048298:GO:0051257:GO:0005634:GO:0045141:GO:0005515:GO:0005715:GO:0048477:GO:0016020:GO:0016321:GO:0032137:GO:0016446	120436	PF01119:PF02518:PF16413:PF13589	6.85	NA
chr7:6026841	SNV	A	1	A/G	PASS	2.5316286391269768e-76	333	A=166,G=167	A=0.4985,G=0.5015	50.15	NA	PMS2	NM_000535.6	PMS2:exonic:NM_000535.6	missense	CAT	11	p.Tyr519His	c.1555T>C	0.56	0.132	83.0	G	AMAF=2.0E-4:GMAF=1.0E-4:EMAF=0.0	NA	NA	Uncertain significance	NA	rs370236216	NA	(dui:ACMG59;dis:ACMG Recommendations...;g:PMS2)(dui:D009369;dis:Neoplasms;g:PMS2)(dui:D009371;dis:Neoplasms by Site;g:PMS2)(dui:D004066;dis:Digestive System Diseases;g:PMS2)(dui:D004067;dis:Digestive System Neoplasms;g:PMS2)(dui:D005767;dis:Gastrointestinal Diseases;g:PMS2)(dui:D005770;dis:Gastrointestinal Neoplasms;g:PMS2)(dui:D007410;dis:Intestinal Diseases;g:PMS2)(dui:D007414;dis:Intestinal Ne…	Adenosine 5'-[Œ≥-thio]triphosphate	AF_OTH=0.0:AF_Adj=8.294E-6:AF_AFR=9.848E-5:AF_EAS=0.0:AF_FIN=0.0:AF_SAS=0.0:AF_NFE=0.0:AF_AMR=0.0	GO:0016887:GO:0036464:GO:0090305:GO:0015630:GO:0006298:GO:0005886:GO:0005654:GO:0003697:GO:0032407:GO:0003677:GO:0005524:GO:0005634:GO:0005515:GO:0004519:GO:0042493:GO:0005829:GO:0032389:GO:0030983:GO:0016446:GO:0032138	600259	PF01119:PF08676:PF02518:PF07661:PF13589	-0.22	NA
chr12:133250183	SNV	C	1	C/T	PASS	3.817684194975452e-83	499	C=283,T=216	C=0.5671,T=0.4329	43.29	NA	POLE	NM_006231.3	POLE:exonic:NM_006231.3	missense	CAG	13	p.Arg446Gln	c.1337G>A	0.09	0.994	43.0	T	AMAF=5.0E-4:GMAF=5.0E-4:EMAF=6.0E-4	0.99:0.99	NA	Uncertain significance	692187:692188:5031059	rs151273553	NA	(dui:D009369;dis:Neoplasms;g:POLE)(dui:D009371;dis:Neoplasms by Site;g:POLE)(dui:D004066;dis:Digestive System Diseases;g:POLE)(dui:D004067;dis:Digestive System Neoplasms;g:POLE)(dui:D005767;dis:Gastrointestinal Diseases;g:POLE)(dui:D005770;dis:Gastrointestinal Neoplasms;g:POLE)(dui:D007410;dis:Intestinal Diseases;g:POLE)(dui:D003108;dis:Colonic Diseases;g:POLE)(dui:D007414;dis:Intestinal Neoplasm…	Cladribine	AF_OTH=0.0:AF_Adj=2.562E-4:AF_AFR=1.93E-4:AF_EAS=0.0:AF_FIN=3.025E-4:AF_SAS=0.0:AF_NFE=4.064E-4:AF_AMR=0.0	GO:0006281:GO:0006260:GO:0006287:GO:0045004:GO:0000731:GO:0005654:GO:0008622:GO:0000166:GO:0003887:GO:0000082:GO:0032201:GO:0071897:GO:0006270:GO:0090305:GO:0008270:GO:0006272:GO:0006297:GO:0048568:GO:0003682:GO:0008310:GO:0005886:GO:0003677:GO:0005634:GO:0008408:GO:0005515:GO:0051539	NA	PF13482:PF08490:PF10108:PF03104:PF00136	7.72	NA
chr12:133234521	SNV	G	1	G/A	PASS	5.9156163417546214e-182	781	G=384,A=397	G=0.4917,A=0.5083	50.83	NA	POLE	NM_006231.4	POLE:exonic:NM_006231.4	missense	ATG	27	p.Thr1104Met	c.3311C>T	0.11	0.074	81.0	A	NA	0.79	NA	Uncertain significance	937298	rs531705054	NA	(dui:D009369;dis:Neoplasms;g:POLE)(dui:D009371;dis:Neoplasms by Site;g:POLE)(dui:D004066;dis:Digestive System Diseases;g:POLE)(dui:D004067;dis:Digestive System Neoplasms;g:POLE)(dui:D005767;dis:Gastrointestinal Diseases;g:POLE)(dui:D005770;dis:Gastrointestinal Neoplasms;g:POLE)(dui:D007410;dis:Intestinal Diseases;g:POLE)(dui:D003108;dis:Colonic Diseases;g:POLE)(dui:D007414;dis:Intestinal Neoplasm…	Cladribine	AF_EAS=0.0:AF_AFR=1.924E-4:AF_SAS=1.212E-4:AF_FIN=0.0:AF_Adj=4.945E-5:AF_NFE=1.499E-5:AF_OTH=0.0:AF_AMR=8.64E-5	GO:0006270:GO:0090305:GO:0008270:GO:0006260:GO:0006272:GO:0006297:GO:0048568:GO:0003682:GO:0006287:GO:0008310:GO:0045004:GO:0000731:GO:0000278:GO:0005886:GO:0005654:GO:0008622:GO:0000166:GO:0003677:GO:0005634:GO:0003887:GO:0005515:GO:0000082:GO:0032201:GO:0051539	174762	PF13482:PF08490:PF10108:PF03104:PF00136	1.38	NA
chr19:50912082	SNV	C	1	C/A	PASS	6.0117373748327294e-242	1250	C=666,A=584	C=0.5328,A=0.4672	46.72	NA	POLD1	NM_001256849.1	POLD1:exonic:NM_001256849.1	missense	ATG	15	p.Leu606Met	c.1816C>A	0.0	1.0	15.0	A	NA	0.9	NA	Uncertain significance	999696	rs1568630225	NA	(dui:D009369;dis:Neoplasms;g:POLD1)(dui:D009371;dis:Neoplasms by Site;g:POLD1)(dui:D017437;dis:Skin and Connective Tissue Diseases;g:POLD1)(dui:D012871;dis:Skin Diseases;g:POLD1)(dui:D005261;dis:Female Urogenital Diseases and Pregnancy Complications;g:POLD1)(dui:D014565;dis:Urogenital Neoplasms;g:POLD1)(dui:D052776;dis:Female Urogenital Diseases;g:POLD1)(dui:D004066;dis:Digestive System Diseases;…	NA	NA	GO:0006281:GO:0043625:GO:0033683:GO:0006260:GO:0006261:GO:0006283:GO:0009411:GO:0006287:GO:0045004:GO:0000731:GO:0005654:GO:0000166:GO:0003887:GO:0032201:GO:0034644:GO:0071897:GO:0005829:GO:0016235:GO:0019985:GO:0070987:GO:0042769:GO:0006296:GO:0008296:GO:0000109:GO:0055089:GO:0000723:GO:0006297:GO:0003682:GO:0006298:GO:0003684:GO:0000784:GO:0003677:GO:0005634:GO:0005515:GO:0046872:GO:0016020:GO:…	174761	PF14260:PF03104:PF00136	2.58	NA
chr7:6018314	INDEL	TGA	2	TGA/T	PASS	1.979247021237555e-38	1351	TGA=1055,T=296	TGA=0.7809,T=0.2191	21.91	0.001	PMS2	NM_000535.7	PMS2:exonic:NM_000535.7	frameshiftDeletion	CAA	13	p.Leu729GlnfsTer6	c.2186_2187delTC	NA	NA	NA	T	GMAF=0.007:AMAF=0.0203:EMAF=1.0E-4	NA	NA	Uncertain significance	NA	rs373630535:rs587779335	NA	(dui:ACMG59;dis:ACMG Recommendations...;g:PMS2)(dui:D009369;dis:Neoplasms;g:PMS2)(dui:D009371;dis:Neoplasms by Site;g:PMS2)(dui:D004066;dis:Digestive System Diseases;g:PMS2)(dui:D004067;dis:Digestive System Neoplasms;g:PMS2)(dui:D005767;dis:Gastrointestinal Diseases;g:PMS2)(dui:D005770;dis:Gastrointestinal Neoplasms;g:PMS2)(dui:D007410;dis:Intestinal Diseases;g:PMS2)(dui:D007414;dis:Intestinal Ne…	Adenosine 5'-[gamma-thio]triphosphate	AF_EAS=0.0:AF_AFR=5.326E-2;0.0:AF_SAS=0.0;3.394E-3:AF_FIN=0.0;2.261E-4:AF_Adj=5.324E-3;1.306E-3:AF_NFE=3.092E-4;1.334E-3:AF_OTH=0.0;8.646E-3:AF_AMR=4.885E-4;2.912E-3	GO:0016887:GO:0036464:GO:0090305:GO:0006298:GO:0005886:GO:0005654:GO:0003697:GO:0032407:GO:0003677:GO:0005524:GO:0005634:GO:0005515:GO:0004519:GO:0042493:GO:0032300:GO:0005829:GO:0032389:GO:0016446:GO:0032138	600259	PF08676:PF01119:PF02518:PF07661:PF13589	2.1,0.34,8.74	NA
chr12:133225927	SNV	G	1	G/A	PASS	5.1999599653349174e-225	1042	G=530,A=512	G=0.5086,A=0.4914	49.14	NA	POLE	NM_006231.4	POLE:exonic:NM_006231.4	missense	TGC	31	p.Arg1324Cys	c.3970C>T	0.0	0.999	180.0	A	NA	1	NA	Uncertain significance	8210213	rs779464847	NA	(dui:D009369;dis:Neoplasms;g:POLE)(dui:D009371;dis:Neoplasms by Site;g:POLE)(dui:D004066;dis:Digestive System Diseases;g:POLE)(dui:D004067;dis:Digestive System Neoplasms;g:POLE)(dui:D005767;dis:Gastrointestinal Diseases;g:POLE)(dui:D005770;dis:Gastrointestinal Neoplasms;g:POLE)(dui:D007410;dis:Intestinal Diseases;g:POLE)(dui:D003108;dis:Colonic Diseases;g:POLE)(dui:D007414;dis:Intestinal Neoplasm…	Cladribine	AF_EAS=0.0:AF_AFR=1.038E-4:AF_SAS=1.82E-4:AF_FIN=0.0:AF_Adj=7.647E-5:AF_NFE=7.792E-5:AF_OTH=0.0:AF_AMR=0.0	GO:0006270:GO:0090305:GO:0008270:GO:0006260:GO:0006272:GO:0006297:GO:0048568:GO:0003682:GO:0006287:GO:0008310:GO:0045004:GO:0000731:GO:0000278:GO:0005886:GO:0005654:GO:0008622:GO:0000166:GO:0003677:GO:0005634:GO:0003887:GO:0005515:GO:0000082:GO:0032201:GO:0051539	174762	PF13482:PF08490:PF10108:PF03104:PF00136	6.34	NA
chr12:133234521	SNV	G	1	G/A	PASS	1.47231250243274e-162	767	G=394,A=373	G=0.5137,A=0.4863	48.63	NA	POLE	NM_006231.4	POLE:exonic:NM_006231.4	missense	ATG	27	p.Thr1104Met	c.3311C>T	0.11	0.074	81.0	A	NA	0.79	NA	Uncertain significance	937298	rs531705054	NA	(dui:D009369;dis:Neoplasms;g:POLE)(dui:D009371;dis:Neoplasms by Site;g:POLE)(dui:D004066;dis:Digestive System Diseases;g:POLE)(dui:D004067;dis:Digestive System Neoplasms;g:POLE)(dui:D005767;dis:Gastrointestinal Diseases;g:POLE)(dui:D005770;dis:Gastrointestinal Neoplasms;g:POLE)(dui:D007410;dis:Intestinal Diseases;g:POLE)(dui:D003108;dis:Colonic Diseases;g:POLE)(dui:D007414;dis:Intestinal Neoplasm…	Cladribine	AF_EAS=0.0:AF_AFR=1.924E-4:AF_SAS=1.212E-4:AF_FIN=0.0:AF_Adj=4.945E-5:AF_NFE=1.499E-5:AF_OTH=0.0:AF_AMR=8.64E-5	GO:0006270:GO:0090305:GO:0008270:GO:0006260:GO:0006272:GO:0006297:GO:0048568:GO:0003682:GO:0006287:GO:0008310:GO:0045004:GO:0000731:GO:0000278:GO:0005886:GO:0005654:GO:0008622:GO:0000166:GO:0003677:GO:0005634:GO:0003887:GO:0005515:GO:0000082:GO:0032201:GO:0051539	174762	PF13482:PF08490:PF10108:PF03104:PF00136	1.38	NA
chr12:133252696	SNV	A	1	A/C	PASS	5.321082592667931e-259	1209	A=617,C=592	A=0.5103,C=0.4897	48.97	NA	POLE	NM_006231.4	POLE:exonic:NM_006231.4	missense	TGC	10	p.Phe335Cys	c.1004T>G	0.0	0.999	205.0	C	NA	NA	NA	Uncertain significance	NA	rs1593078268	NA	(dui:D009369;dis:Neoplasms;g:POLE)(dui:D009371;dis:Neoplasms by Site;g:POLE)(dui:D004066;dis:Digestive System Diseases;g:POLE)(dui:D004067;dis:Digestive System Neoplasms;g:POLE)(dui:D005767;dis:Gastrointestinal Diseases;g:POLE)(dui:D005770;dis:Gastrointestinal Neoplasms;g:POLE)(dui:D007410;dis:Intestinal Diseases;g:POLE)(dui:D003108;dis:Colonic Diseases;g:POLE)(dui:D007414;dis:Intestinal Neoplasm…	Cladribine	NA	GO:0006270:GO:0090305:GO:0008270:GO:0006260:GO:0006272:GO:0006297:GO:0048568:GO:0003682:GO:0006287:GO:0008310:GO:0045004:GO:0000731:GO:0000278:GO:0005886:GO:0005654:GO:0008622:GO:0000166:GO:0003677:GO:0005634:GO:0003887:GO:0005515:GO:0000082:GO:0032201:GO:0051539	174762	PF13482:PF08490:PF10108:PF03104:PF00136	9.24	NA
chr3:37089050	SNV	A	1	A/G	PASS	5.55903e-302	1351	A=658,G=693	A=0.487,G=0.513	51.30	NA	MLH1	NM_000249.4	MLH1:exonic:NM_000249.4	missense	GGT	16	p.Asp591Gly	c.1772A>G	0.01	0.002	94.0	G	NA	NA	NA	Uncertain significance	NA	rs63749868	NA	(dui:ACMG59;dis:ACMG Recommendations...;g:MLH1)(dui:D009369;dis:Neoplasms;g:MLH1)(dui:D009371;dis:Neoplasms by Site;g:MLH1)(dui:D009358;dis:Congenital, Hereditary, and Neonatal Diseases and Abnormalities;g:MLH1)(dui:D030342;dis:Genetic Diseases, Inborn;g:MLH1)(dui:D009386;dis:Neoplastic Syndromes, Hereditary;g:MLH1)(dui:D003123;dis:Colorectal Neoplasms, Hereditary Nonpolyposis;g:MLH1)(dui:D004066…	NA	NA	GO:0016887:GO:0000712:GO:0006303:GO:0000795:GO:0001673:GO:0005654:GO:0003697:GO:0032407:GO:0005524:GO:0032300:GO:0032389:GO:0045190:GO:0007060:GO:0007283:GO:0008630:GO:0048304:GO:0003682:GO:0006298:GO:0045950:GO:0007129:GO:0000289:GO:0005712:GO:0043060:GO:0048298:GO:0051257:GO:0005634:GO:0045141:GO:0009617:GO:0005515:GO:0005715:GO:0048477:GO:0016020:GO:0016321:GO:0032137:GO:0016446:GO:0019899	120436	PF01119:PF02518:PF16413:PF13589	7.29	NA
chr12:133252696	SNV	A	1	A/C	PASS	9.772372209558313e-253	1227	A=637,C=590	A=0.5192,C=0.4808	48.08	NA	POLE	NM_006231.4	POLE:exonic:NM_006231.4	missense	TGC	10	p.Phe335Cys	c.1004T>G	0.0	0.999	205.0	C	NA	NA	NA	Uncertain significance	NA	rs1593078268	NA	(dui:D009369;dis:Neoplasms;g:POLE)(dui:D009371;dis:Neoplasms by Site;g:POLE)(dui:D004066;dis:Digestive System Diseases;g:POLE)(dui:D004067;dis:Digestive System Neoplasms;g:POLE)(dui:D005767;dis:Gastrointestinal Diseases;g:POLE)(dui:D005770;dis:Gastrointestinal Neoplasms;g:POLE)(dui:D007410;dis:Intestinal Diseases;g:POLE)(dui:D003108;dis:Colonic Diseases;g:POLE)(dui:D007414;dis:Intestinal Neoplasm…	Cladribine	NA	GO:0006270:GO:0090305:GO:0008270:GO:0006260:GO:0006272:GO:0006297:GO:0048568:GO:0003682:GO:0006287:GO:0008310:GO:0045004:GO:0000731:GO:0000278:GO:0005886:GO:0005654:GO:0008622:GO:0000166:GO:0003677:GO:0005634:GO:0003887:GO:0005515:GO:0000082:GO:0032201:GO:0051539	174762	PF13482:PF08490:PF10108:PF03104:PF00136	9.24	NA
chr2:48027469	SNV	T	1	T/A	PASS	0	1920	T=973,A=947	T=0.5068,A=0.4932	49.32	NA	MSH6	NM_000179.3	MSH6:exonic:NM_000179.3	missense	AGT	4	p.Cys783Ser	c.2347T>A	0.0	0.998	112.0	A	GMAF=2.0E-4:AMAF=5.0E-4:EMAF=0.0	NA	NA	Uncertain significance	NA	rs267608065:rs373721483	NA	(dui:ACMG59;dis:ACMG Recommendations...;g:MSH6)(dui:D009369;dis:Neoplasms;g:MSH6)(dui:D009371;dis:Neoplasms by Site;g:MSH6)(dui:D009358;dis:Congenital, Hereditary, and Neonatal Diseases and Abnormalities;g:MSH6)(dui:D030342;dis:Genetic Diseases, Inborn;g:MSH6)(dui:D009386;dis:Neoplastic Syndromes, Hereditary;g:MSH6)(dui:D004066;dis:Digestive System Diseases;g:MSH6)(dui:D004067;dis:Digestive Syste…	NA	AF_EAS=0.0:AF_AFR=1.929E-4:AF_SAS=0.0:AF_FIN=0.0:AF_Adj=1.649E-5:AF_NFE=0.0:AF_OTH=0.0:AF_AMR=0.0	GO:0016447:GO:0016887:GO:0006281:GO:0008340:GO:0035064:GO:0036297:GO:0003690:GO:0051096:GO:0005794:GO:0009411:GO:0097193:GO:0000710:GO:0005654:GO:0000287:GO:0005524:GO:0032405:GO:0043570:GO:0043231:GO:0016032:GO:0032300:GO:0005829:GO:0032301:GO:0030983:GO:0045190:GO:0008094:GO:0006290:GO:0042803:GO:0032142:GO:0032143:GO:0008630:GO:0003682:GO:0006298:GO:0043531:GO:0000400:GO:0045910:GO:0005634:GO:…	600678	PF01624:PF00855:PF05188:PF05192:PF00488:PF05190	7.98	NA
chr2:48032099	SNV	A	1	A/C	PASS	4.207266283844119e-254	1071	A=521,C=550	A=0.4865,C=0.5135	51.35	NA	MSH6	NM_000179.3	MSH6:exonic:NM_000179.3	missense	GAC	6	p.Glu1163Asp	c.3489A>C	0.03	0.045	45.0	C	NA	NA	NA	Uncertain significance	NA	rs531674673:rs63750359	NA	(dui:ACMG59;dis:ACMG Recommendations...;g:MSH6)(dui:D009369;dis:Neoplasms;g:MSH6)(dui:D009371;dis:Neoplasms by Site;g:MSH6)(dui:D009358;dis:Congenital, Hereditary, and Neonatal Diseases and Abnormalities;g:MSH6)(dui:D030342;dis:Genetic Diseases, Inborn;g:MSH6)(dui:D009386;dis:Neoplastic Syndromes, Hereditary;g:MSH6)(dui:D004066;dis:Digestive System Diseases;g:MSH6)(dui:D004067;dis:Digestive Syste…	NA	AF_EAS=0.0:AF_AFR=0.0:AF_SAS=0.0:AF_FIN=0.0:AF_Adj=8.243E-6:AF_NFE=0.0:AF_OTH=0.0:AF_AMR=8.667E-5	GO:0016447:GO:0016887:GO:0006281:GO:0008340:GO:0035064:GO:0036297:GO:0003690:GO:0051096:GO:0005794:GO:0009411:GO:0097193:GO:0000710:GO:0005654:GO:0000287:GO:0005524:GO:0032405:GO:0043570:GO:0043231:GO:0016032:GO:0032300:GO:0005829:GO:0032301:GO:0030983:GO:0045190:GO:0008094:GO:0006290:GO:0042803:GO:0032142:GO:0032143:GO:0008630:GO:0003682:GO:0006298:GO:0043531:GO:0000400:GO:0045910:GO:0005634:GO:…	600678	PF01624:PF00855:PF05188:PF05192:PF00488:PF05190	1.04	NA
chr12:133225520	SNV	G	1	G/A	PASS	0	1690	G=854,A=836	G=0.5053,A=0.4947	49.47	NA	POLE	NM_006231.4	POLE:exonic:NM_006231.4	missense	TGC	32	p.Arg1382Cys	c.4144C>T	0.0	0.994	180.0	A	NA	0.95	NA	Uncertain significance	3458337	rs5744904	NA	(dui:D009369;dis:Neoplasms;g:POLE)(dui:D009371;dis:Neoplasms by Site;g:POLE)(dui:D004066;dis:Digestive System Diseases;g:POLE)(dui:D004067;dis:Digestive System Neoplasms;g:POLE)(dui:D005767;dis:Gastrointestinal Diseases;g:POLE)(dui:D005770;dis:Gastrointestinal Neoplasms;g:POLE)(dui:D007410;dis:Intestinal Diseases;g:POLE)(dui:D003108;dis:Colonic Diseases;g:POLE)(dui:D007414;dis:Intestinal Neoplasm…	Cladribine	NA	GO:0006270:GO:0090305:GO:0008270:GO:0006260:GO:0006272:GO:0006297:GO:0048568:GO:0003682:GO:0006287:GO:0008310:GO:0045004:GO:0000731:GO:0000278:GO:0005886:GO:0005654:GO:0008622:GO:0000166:GO:0003677:GO:0005634:GO:0003887:GO:0005515:GO:0000082:GO:0032201:GO:0051539	174762	PF13482:PF08490:PF10108:PF03104:PF00136	3.11	NA
chr12:133225996	SNV	C	1	C/T	PASS	1.3031667784523264e-171	828	C=429,T=399	C=0.5181,T=0.4819	48.19	NA	POLE	NM_006231.4	POLE:exonic:NM_006231.4	missense	ATG	31	p.Val1301Met	c.3901G>A	0.11	0.001	21.0	T	NA	NA	NA	Uncertain significance	NA	rs112098447	NA	(dui:D009369;dis:Neoplasms;g:POLE)(dui:D009371;dis:Neoplasms by Site;g:POLE)(dui:D004066;dis:Digestive System Diseases;g:POLE)(dui:D004067;dis:Digestive System Neoplasms;g:POLE)(dui:D005767;dis:Gastrointestinal Diseases;g:POLE)(dui:D005770;dis:Gastrointestinal Neoplasms;g:POLE)(dui:D007410;dis:Intestinal Diseases;g:POLE)(dui:D003108;dis:Colonic Diseases;g:POLE)(dui:D007414;dis:Intestinal Neoplasm…	Cladribine	NA	GO:0006270:GO:0090305:GO:0008270:GO:0006260:GO:0006272:GO:0006297:GO:0048568:GO:0003682:GO:0006287:GO:0008310:GO:0045004:GO:0000731:GO:0000278:GO:0005886:GO:0005654:GO:0008622:GO:0000166:GO:0003677:GO:0005634:GO:0003887:GO:0005515:GO:0000082:GO:0032201:GO:0051539	174762	PF13482:PF08490:PF10108:PF03104:PF00136	0.46	NA
chr7:6018314	INDEL	TGA	2	TGA/T	PASS	3.2809529311311773e-60	499	TGA=312,T=187	TGA=0.6253,T=0.3747	37.47	0.001	PMS2	NM_000535.7	PMS2:exonic:NM_000535.7	frameshiftDeletion	CAA	13	p.Leu729GlnfsTer6	c.2186_2187delTC	NA	NA	NA	T	GMAF=0.007:AMAF=0.0203:EMAF=1.0E-4	NA	NA	Uncertain significance	NA	rs373630535:rs587779335	NA	(dui:ACMG59;dis:ACMG Recommendations...;g:PMS2)(dui:D009369;dis:Neoplasms;g:PMS2)(dui:D009371;dis:Neoplasms by Site;g:PMS2)(dui:D004066;dis:Digestive System Diseases;g:PMS2)(dui:D004067;dis:Digestive System Neoplasms;g:PMS2)(dui:D005767;dis:Gastrointestinal Diseases;g:PMS2)(dui:D005770;dis:Gastrointestinal Neoplasms;g:PMS2)(dui:D007410;dis:Intestinal Diseases;g:PMS2)(dui:D007414;dis:Intestinal Ne…	Adenosine 5'-[gamma-thio]triphosphate	AF_EAS=0.0:AF_AFR=5.326E-2;0.0:AF_SAS=0.0;3.394E-3:AF_FIN=0.0;2.261E-4:AF_Adj=5.324E-3;1.306E-3:AF_NFE=3.092E-4;1.334E-3:AF_OTH=0.0;8.646E-3:AF_AMR=4.885E-4;2.912E-3	GO:0016887:GO:0036464:GO:0090305:GO:0006298:GO:0005886:GO:0005654:GO:0003697:GO:0032407:GO:0003677:GO:0005524:GO:0005634:GO:0005515:GO:0004519:GO:0042493:GO:0032300:GO:0005829:GO:0032389:GO:0016446:GO:0032138	600259	PF08676:PF01119:PF02518:PF07661:PF13589	2.1,0.34,8.74	NA
chr12:133257855	SNV	C	1	C/T	PASS	0	1547	C=737,T=810	C=0.4764,T=0.5236	52.36	NA	POLE	NM_006231.4	POLE:exonic:NM_006231.4	missense	ACC	2	p.Ala25Thr	c.73G>A	0.42	0.002	58.0	T	NA	0.23	NA	Uncertain significance	937344	rs773204331	NA	(dui:D009369;dis:Neoplasms;g:POLE)(dui:D009371;dis:Neoplasms by Site;g:POLE)(dui:D004066;dis:Digestive System Diseases;g:POLE)(dui:D004067;dis:Digestive System Neoplasms;g:POLE)(dui:D005767;dis:Gastrointestinal Diseases;g:POLE)(dui:D005770;dis:Gastrointestinal Neoplasms;g:POLE)(dui:D007410;dis:Intestinal Diseases;g:POLE)(dui:D003108;dis:Colonic Diseases;g:POLE)(dui:D007414;dis:Intestinal Neoplasm…	Cladribine	AF_EAS=0.0:AF_AFR=0.0:AF_SAS=6.058E-5:AF_FIN=0.0:AF_Adj=2.474E-5:AF_NFE=3E-5:AF_OTH=0.0:AF_AMR=0.0	GO:0006270:GO:0090305:GO:0008270:GO:0006260:GO:0006272:GO:0006297:GO:0048568:GO:0003682:GO:0006287:GO:0008310:GO:0045004:GO:0000731:GO:0000278:GO:0005886:GO:0005654:GO:0008622:GO:0000166:GO:0003677:GO:0005634:GO:0003887:GO:0005515:GO:0000082:GO:0032201:GO:0051539	174762	PF13482:PF08490:PF10108:PF03104:PF00136	-0.46	NA
chr7:6018314	INDEL	TGA	2	TGA/T	PASS	1.6304218992825609e-49	1055	TGA=781,T=274	TGA=0.7403,T=0.2597	25.97	0.001	PMS2	NM_000535.7	PMS2:exonic:NM_000535.7	frameshiftDeletion	CAA	13	p.Leu729GlnfsTer6	c.2186_2187delTC	NA	NA	NA	T	GMAF=0.007:AMAF=0.0203:EMAF=1.0E-4	NA	NA	Uncertain significance	NA	rs373630535:rs587779335	NA	(dui:ACMG59;dis:ACMG Recommendations...;g:PMS2)(dui:D009369;dis:Neoplasms;g:PMS2)(dui:D009371;dis:Neoplasms by Site;g:PMS2)(dui:D004066;dis:Digestive System Diseases;g:PMS2)(dui:D004067;dis:Digestive System Neoplasms;g:PMS2)(dui:D005767;dis:Gastrointestinal Diseases;g:PMS2)(dui:D005770;dis:Gastrointestinal Neoplasms;g:PMS2)(dui:D007410;dis:Intestinal Diseases;g:PMS2)(dui:D007414;dis:Intestinal Ne…	Adenosine 5'-[gamma-thio]triphosphate	AF_EAS=0.0:AF_AFR=5.326E-2;0.0:AF_SAS=0.0;3.394E-3:AF_FIN=0.0;2.261E-4:AF_Adj=5.324E-3;1.306E-3:AF_NFE=3.092E-4;1.334E-3:AF_OTH=0.0;8.646E-3:AF_AMR=4.885E-4;2.912E-3	GO:0016887:GO:0036464:GO:0090305:GO:0006298:GO:0005886:GO:0005654:GO:0003697:GO:0032407:GO:0003677:GO:0005524:GO:0005634:GO:0005515:GO:0004519:GO:0042493:GO:0032300:GO:0005829:GO:0032389:GO:0016446:GO:0032138	600259	PF08676:PF01119:PF02518:PF07661:PF13589	2.1,0.34,8.74	NA
chr7:6031668	SNV	C	1	C/G	PASS	2.2542392121524738e-184	797	C=393,G=404	C=0.4931,G=0.5069	50.69	0.0	PMS2	NM_000535.7	PMS2:exonic:NM_000535.7	missense	GAC	9	p.Glu308Asp	c.924G>C	0.0	0.268	45.0	G	NA	NA	NA	Uncertain significance	NA	rs114185660:rs1554299430	NA	(dui:ACMG59;dis:ACMG Recommendations...;g:PMS2)(dui:D009369;dis:Neoplasms;g:PMS2)(dui:D009371;dis:Neoplasms by Site;g:PMS2)(dui:D004066;dis:Digestive System Diseases;g:PMS2)(dui:D004067;dis:Digestive System Neoplasms;g:PMS2)(dui:D005767;dis:Gastrointestinal Diseases;g:PMS2)(dui:D005770;dis:Gastrointestinal Neoplasms;g:PMS2)(dui:D007410;dis:Intestinal Diseases;g:PMS2)(dui:D007414;dis:Intestinal Ne…	Adenosine 5'-[gamma-thio]triphosphate	AF_EAS=0.0:AF_AFR=9.714E-5:AF_SAS=6.1E-5:AF_FIN=0.0:AF_Adj=2.494E-5:AF_NFE=1.513E-5:AF_OTH=0.0:AF_AMR=0.0	GO:0016887:GO:0036464:GO:0090305:GO:0006298:GO:0005886:GO:0005654:GO:0003697:GO:0032407:GO:0003677:GO:0005524:GO:0005634:GO:0005515:GO:0004519:GO:0042493:GO:0032300:GO:0005829:GO:0032389:GO:0016446:GO:0032138	600259	PF08676:PF01119:PF02518:PF07661:PF13589	1.93	NA
chr12:133219285	SNV	C	1	C/T	PASS	1.8071741260108888e-114	591	C=316,T=275	C=0.5347,T=0.4653	46.53	NA	POLE	NM_006231.4	POLE:exonic:NM_006231.4	missense	ATT	37	p.Val1587Ile	c.4759G>A	0.34	0.0	29.0	T	GMAF=1.0E-4:AMAF=2.0E-4:EMAF=0.0	NA	NA	Uncertain significance	NA	rs372388555	NA	(dui:D009369;dis:Neoplasms;g:POLE)(dui:D009371;dis:Neoplasms by Site;g:POLE)(dui:D004066;dis:Digestive System Diseases;g:POLE)(dui:D004067;dis:Digestive System Neoplasms;g:POLE)(dui:D005767;dis:Gastrointestinal Diseases;g:POLE)(dui:D005770;dis:Gastrointestinal Neoplasms;g:POLE)(dui:D007410;dis:Intestinal Diseases;g:POLE)(dui:D003108;dis:Colonic Diseases;g:POLE)(dui:D007414;dis:Intestinal Neoplasm…	Cladribine	AF_EAS=0.0:AF_AFR=1.942E-4:AF_SAS=0.0:AF_FIN=0.0:AF_Adj=1.652E-5:AF_NFE=0.0:AF_OTH=0.0:AF_AMR=0.0	GO:0006270:GO:0090305:GO:0008270:GO:0006260:GO:0006272:GO:0006297:GO:0048568:GO:0003682:GO:0006287:GO:0008310:GO:0045004:GO:0000731:GO:0000278:GO:0005886:GO:0005654:GO:0008622:GO:0000166:GO:0003677:GO:0005634:GO:0003887:GO:0005515:GO:0000082:GO:0032201:GO:0051539	174762	PF13482:PF08490:PF10108:PF03104:PF00136	1.46	NA

## Sheet: UniqueMMR_VUSs_LowMAF
List of Variants of Uncertain Significance in in exonic regions of the mismatch repair genes with MAF≤0.05.
# locus	type	ref	length	genotype	filter	pvalue	coverage	allele_coverage	allele_ratio	%_frequency	maf	gene	transcript	location	function	codon	exon	protein	coding	sift	polyphen	grantham	normalizedAlt	5000Exomes	FATHMM	NamedVariants	clinvar	cosmic	dbsnp	dgv	dra	drugbank	exac	go	omim	pfam	phylop	MyVariantDefaultDb_hg19
chr2:48023135	SNV	A	1	A/G	PASS	1.2589254117941507e-116	559	A=290,G=269	A=0.5188,G=0.4812	48.12	NA	MSH6	NM_000179.3	MSH6:exonic:NM_000179.3	missense	AGG	3	p.Lys187Arg	c.560A>G	0.61	0.127	26.0	G	NA	0.76	NA	Uncertain significance	33663	rs1553411459	NA	(dui:ACMG59;dis:ACMG Recommendations...;g:MSH6)(dui:D009369;dis:Neoplasms;g:MSH6)(dui:D009371;dis:Neoplasms by Site;g:MSH6)(dui:D009358;dis:Congenital, Hereditary, and Neonatal Diseases and Abnormalities;g:MSH6)(dui:D030342;dis:Genetic Diseases, Inborn;g:MSH6)(dui:D009386;dis:Neoplastic Syndromes, Hereditary;g:MSH6)(dui:D004066;dis:Digestive System Diseases;g:MSH6)(dui:D004067;dis:Digestive Syste…	NA	NA	GO:0016447:GO:0016887:GO:0006281:GO:0008340:GO:0035064:GO:0036297:GO:0003690:GO:0051096:GO:0005794:GO:0009411:GO:0097193:GO:0000710:GO:0005654:GO:0000287:GO:0005524:GO:0032405:GO:0043570:GO:0043231:GO:0016032:GO:0032300:GO:0005829:GO:0032301:GO:0030983:GO:0045190:GO:0008094:GO:0006290:GO:0042803:GO:0032142:GO:0032143:GO:0008630:GO:0003682:GO:0006298:GO:0043531:GO:0000400:GO:0045910:GO:0005634:GO:…	600678	PF01624:PF00855:PF05188:PF05192:PF00488:PF05190	3.47	NA
chr2:47630487	SNV	G	1	G/T	PASS	9.682778562612267e-128	601	G=309,T=292	G=0.5141,T=0.4859	48.59	NA	MSH2	NM_000251.3	MSH2:exonic:NM_000251.3	missense	TCC	1	p.Ala53Ser	c.157G>T	0.0	0.999	99.0	T	NA	NA	NA	Uncertain significance	NA	rs755931648	NA	(dui:ACMG59;dis:ACMG Recommendations...;g:MSH2)(dui:D009369;dis:Neoplasms;g:MSH2)(dui:D009371;dis:Neoplasms by Site;g:MSH2)(dui:D009358;dis:Congenital, Hereditary, and Neonatal Diseases and Abnormalities;g:MSH2)(dui:D030342;dis:Genetic Diseases, Inborn;g:MSH2)(dui:D009386;dis:Neoplastic Syndromes, Hereditary;g:MSH2)(dui:D004066;dis:Digestive System Diseases;g:MSH2)(dui:D005767;dis:Gastrointestina…	NA	AF_EAS=0.0:AF_AFR=3.206E-4:AF_SAS=0.0:AF_FIN=0.0:AF_Adj=3.716E-5:AF_NFE=0.0:AF_OTH=1.859E-3:AF_AMR=0.0	GO:0007050:GO:0016447:GO:0016887:GO:0006281:GO:0008584:GO:0008022:GO:0008340:GO:0003690:GO:0042771:GO:0051096:GO:0003697:GO:0032405:GO:0006119:GO:0001701:GO:0030983:GO:0019724:GO:0019901:GO:0030183:GO:0006298:GO:0000784:GO:0048298:GO:0005634:GO:0002204:GO:0005515:GO:0071168:GO:0019237:GO:0010224:GO:0032357:GO:0016446:GO:0010165:GO:0006301:GO:0005654:GO:0006302:GO:0043524:GO:0000287:GO:0005524:GO:…	609309	PF01624:PF05188:PF05192:PF00488:PF05190	7.15	NA
chr2:47637374	SNV	C	1	C/G	PASS	3.190068435975199e-87	471	C=257,G=214	C=0.5456,G=0.4544	45.44	NA	MSH2	NM_000251.3	MSH2:exonic:NM_000251.3	missense	GAG	3	p.Gln170Glu	c.508C>G	1.0	0.002	29.0	G	GMAF=1.0E-4:AMAF=2.0E-4:EMAF=0.0	0.97	NA	Uncertain significance	8820322	rs63750843	NA	(dui:ACMG59;dis:ACMG Recommendations...;g:MSH2)(dui:D009369;dis:Neoplasms;g:MSH2)(dui:D009371;dis:Neoplasms by Site;g:MSH2)(dui:D009358;dis:Congenital, Hereditary, and Neonatal Diseases and Abnormalities;g:MSH2)(dui:D030342;dis:Genetic Diseases, Inborn;g:MSH2)(dui:D009386;dis:Neoplastic Syndromes, Hereditary;g:MSH2)(dui:D004066;dis:Digestive System Diseases;g:MSH2)(dui:D005767;dis:Gastrointestina…	NA	AF_EAS=0.0:AF_AFR=2.883E-4:AF_SAS=0.0:AF_FIN=0.0:AF_Adj=2.471E-5:AF_NFE=0.0:AF_OTH=0.0:AF_AMR=0.0	GO:0007050:GO:0016447:GO:0016887:GO:0006281:GO:0008584:GO:0008022:GO:0008340:GO:0003690:GO:0042771:GO:0051096:GO:0003697:GO:0032405:GO:0006119:GO:0001701:GO:0030983:GO:0019724:GO:0019901:GO:0030183:GO:0006298:GO:0000784:GO:0048298:GO:0005634:GO:0002204:GO:0005515:GO:0071168:GO:0019237:GO:0010224:GO:0032357:GO:0016446:GO:0010165:GO:0006301:GO:0005654:GO:0006302:GO:0043524:GO:0000287:GO:0005524:GO:…	609309	PF01624:PF05188:PF05192:PF00488:PF05190	4.8	NA
chr7:6031668	SNV	C	1	C/G	PASS	5.610479760324643e-119	549	C=280,G=269	C=0.51,G=0.49	49.00	0.0	PMS2	NM_000535.7	PMS2:exonic:NM_000535.7	missense	GAC	9	p.Glu308Asp	c.924G>C	0.0	0.268	45.0	G	NA	NA	NA	Uncertain significance	NA	rs114185660:rs1554299430	NA	(dui:ACMG59;dis:ACMG Recommendations...;g:PMS2)(dui:D009369;dis:Neoplasms;g:PMS2)(dui:D009371;dis:Neoplasms by Site;g:PMS2)(dui:D004066;dis:Digestive System Diseases;g:PMS2)(dui:D004067;dis:Digestive System Neoplasms;g:PMS2)(dui:D005767;dis:Gastrointestinal Diseases;g:PMS2)(dui:D005770;dis:Gastrointestinal Neoplasms;g:PMS2)(dui:D007410;dis:Intestinal Diseases;g:PMS2)(dui:D007414;dis:Intestinal Ne…	Adenosine 5'-[gamma-thio]triphosphate	AF_EAS=0.0:AF_AFR=9.714E-5:AF_SAS=6.1E-5:AF_FIN=0.0:AF_Adj=2.494E-5:AF_NFE=1.513E-5:AF_OTH=0.0:AF_AMR=0.0	GO:0016887:GO:0036464:GO:0090305:GO:0006298:GO:0005886:GO:0005654:GO:0003697:GO:0032407:GO:0003677:GO:0005524:GO:0005634:GO:0005515:GO:0004519:GO:0042493:GO:0032300:GO:0005829:GO:0032389:GO:0016446:GO:0032138	600259	PF08676:PF01119:PF02518:PF07661:PF13589	1.93	NA
chr3:37061929	SNV	A	1	A/G	PASS	2.0758692704951962e-53	263	A=139,G=124	A=0.5285,G=0.4715	47.15	0	MLH1	NM_000249.3	MLH1:exonic:NM_000249.3	missense	AGT	11	p.Asn338Ser	c.1013A>G	0.2	0.506	46.0	G	AMAF=0.0:GMAF=1.0E-4:EMAF=1.0E-4	NA	NA	Uncertain significance	NA	rs63751467	NA	(dui:ACMG59;dis:ACMG Recommendations...;g:MLH1)(dui:D009369;dis:Neoplasms;g:MLH1)(dui:D009371;dis:Neoplasms by Site;g:MLH1)(dui:D009358;dis:Congenital, Hereditary, and Neonatal Diseases and Abnormalities;g:MLH1)(dui:D030342;dis:Genetic Diseases, Inborn;g:MLH1)(dui:D009386;dis:Neoplastic Syndromes, Hereditary;g:MLH1)(dui:D003123;dis:Colorectal Neoplasms, Hereditary Nonpolyposis;g:MLH1)(dui:D004066…	NA	AF_OTH=0.0:AF_Adj=5.786E-5:AF_AFR=0.0:AF_EAS=0.0:AF_FIN=0.0:AF_SAS=6.067E-5:AF_NFE=9.02E-5:AF_AMR=0.0	GO:0016887:GO:0000712:GO:0006303:GO:0000795:GO:0001673:GO:0005654:GO:0003697:GO:0032407:GO:0005524:GO:0032300:GO:0032389:GO:0030983:GO:0045190:GO:0007060:GO:0007283:GO:0008630:GO:0048304:GO:0003682:GO:0006298:GO:0045950:GO:0007129:GO:0000289:GO:0005712:GO:0043060:GO:0048298:GO:0051257:GO:0005634:GO:0045141:GO:0005515:GO:0005715:GO:0048477:GO:0016020:GO:0016321:GO:0032137:GO:0016446	120436	PF01119:PF02518:PF16413:PF13589	6.85	NA
chr7:6026841	SNV	A	1	A/G	PASS	2.5316286391269768e-76	333	A=166,G=167	A=0.4985,G=0.5015	50.15	NA	PMS2	NM_000535.6	PMS2:exonic:NM_000535.6	missense	CAT	11	p.Tyr519His	c.1555T>C	0.56	0.132	83.0	G	AMAF=2.0E-4:GMAF=1.0E-4:EMAF=0.0	NA	NA	Uncertain significance	NA	rs370236216	NA	(dui:ACMG59;dis:ACMG Recommendations...;g:PMS2)(dui:D009369;dis:Neoplasms;g:PMS2)(dui:D009371;dis:Neoplasms by Site;g:PMS2)(dui:D004066;dis:Digestive System Diseases;g:PMS2)(dui:D004067;dis:Digestive System Neoplasms;g:PMS2)(dui:D005767;dis:Gastrointestinal Diseases;g:PMS2)(dui:D005770;dis:Gastrointestinal Neoplasms;g:PMS2)(dui:D007410;dis:Intestinal Diseases;g:PMS2)(dui:D007414;dis:Intestinal Ne…	Adenosine 5'-[Œ≥-thio]triphosphate	AF_OTH=0.0:AF_Adj=8.294E-6:AF_AFR=9.848E-5:AF_EAS=0.0:AF_FIN=0.0:AF_SAS=0.0:AF_NFE=0.0:AF_AMR=0.0	GO:0016887:GO:0036464:GO:0090305:GO:0015630:GO:0006298:GO:0005886:GO:0005654:GO:0003697:GO:0032407:GO:0003677:GO:0005524:GO:0005634:GO:0005515:GO:0004519:GO:0042493:GO:0005829:GO:0032389:GO:0030983:GO:0016446:GO:0032138	600259	PF01119:PF08676:PF02518:PF07661:PF13589	-0.22	NA
chr7:6018314	INDEL	TGA	2	TGA/T	PASS	1.979247021237555e-38	1351	TGA=1055,T=296	TGA=0.7809,T=0.2191	21.91	0.001	PMS2	NM_000535.7	PMS2:exonic:NM_000535.7	frameshiftDeletion	CAA	13	p.Leu729GlnfsTer6	c.2186_2187delTC	NA	NA	NA	T	GMAF=0.007:AMAF=0.0203:EMAF=1.0E-4	NA	NA	Uncertain significance	NA	rs373630535:rs587779335	NA	(dui:ACMG59;dis:ACMG Recommendations...;g:PMS2)(dui:D009369;dis:Neoplasms;g:PMS2)(dui:D009371;dis:Neoplasms by Site;g:PMS2)(dui:D004066;dis:Digestive System Diseases;g:PMS2)(dui:D004067;dis:Digestive System Neoplasms;g:PMS2)(dui:D005767;dis:Gastrointestinal Diseases;g:PMS2)(dui:D005770;dis:Gastrointestinal Neoplasms;g:PMS2)(dui:D007410;dis:Intestinal Diseases;g:PMS2)(dui:D007414;dis:Intestinal Ne…	Adenosine 5'-[gamma-thio]triphosphate	AF_EAS=0.0:AF_AFR=5.326E-2;0.0:AF_SAS=0.0;3.394E-3:AF_FIN=0.0;2.261E-4:AF_Adj=5.324E-3;1.306E-3:AF_NFE=3.092E-4;1.334E-3:AF_OTH=0.0;8.646E-3:AF_AMR=4.885E-4;2.912E-3	GO:0016887:GO:0036464:GO:0090305:GO:0006298:GO:0005886:GO:0005654:GO:0003697:GO:0032407:GO:0003677:GO:0005524:GO:0005634:GO:0005515:GO:0004519:GO:0042493:GO:0032300:GO:0005829:GO:0032389:GO:0016446:GO:0032138	600259	PF08676:PF01119:PF02518:PF07661:PF13589	2.1,0.34,8.74	NA
chr3:37089050	SNV	A	1	A/G	PASS	5.55903e-302	1351	A=658,G=693	A=0.487,G=0.513	51.30	NA	MLH1	NM_000249.4	MLH1:exonic:NM_000249.4	missense	GGT	16	p.Asp591Gly	c.1772A>G	0.01	0.002	94.0	G	NA	NA	NA	Uncertain significance	NA	rs63749868	NA	(dui:ACMG59;dis:ACMG Recommendations...;g:MLH1)(dui:D009369;dis:Neoplasms;g:MLH1)(dui:D009371;dis:Neoplasms by Site;g:MLH1)(dui:D009358;dis:Congenital, Hereditary, and Neonatal Diseases and Abnormalities;g:MLH1)(dui:D030342;dis:Genetic Diseases, Inborn;g:MLH1)(dui:D009386;dis:Neoplastic Syndromes, Hereditary;g:MLH1)(dui:D003123;dis:Colorectal Neoplasms, Hereditary Nonpolyposis;g:MLH1)(dui:D004066…	NA	NA	GO:0016887:GO:0000712:GO:0006303:GO:0000795:GO:0001673:GO:0005654:GO:0003697:GO:0032407:GO:0005524:GO:0032300:GO:0032389:GO:0045190:GO:0007060:GO:0007283:GO:0008630:GO:0048304:GO:0003682:GO:0006298:GO:0045950:GO:0007129:GO:0000289:GO:0005712:GO:0043060:GO:0048298:GO:0051257:GO:0005634:GO:0045141:GO:0009617:GO:0005515:GO:0005715:GO:0048477:GO:0016020:GO:0016321:GO:0032137:GO:0016446:GO:0019899	120436	PF01119:PF02518:PF16413:PF13589	7.29	NA
chr2:48027469	SNV	T	1	T/A	PASS	0	1920	T=973,A=947	T=0.5068,A=0.4932	49.32	NA	MSH6	NM_000179.3	MSH6:exonic:NM_000179.3	missense	AGT	4	p.Cys783Ser	c.2347T>A	0.0	0.998	112.0	A	GMAF=2.0E-4:AMAF=5.0E-4:EMAF=0.0	NA	NA	Uncertain significance	NA	rs267608065:rs373721483	NA	(dui:ACMG59;dis:ACMG Recommendations...;g:MSH6)(dui:D009369;dis:Neoplasms;g:MSH6)(dui:D009371;dis:Neoplasms by Site;g:MSH6)(dui:D009358;dis:Congenital, Hereditary, and Neonatal Diseases and Abnormalities;g:MSH6)(dui:D030342;dis:Genetic Diseases, Inborn;g:MSH6)(dui:D009386;dis:Neoplastic Syndromes, Hereditary;g:MSH6)(dui:D004066;dis:Digestive System Diseases;g:MSH6)(dui:D004067;dis:Digestive Syste…	NA	AF_EAS=0.0:AF_AFR=1.929E-4:AF_SAS=0.0:AF_FIN=0.0:AF_Adj=1.649E-5:AF_NFE=0.0:AF_OTH=0.0:AF_AMR=0.0	GO:0016447:GO:0016887:GO:0006281:GO:0008340:GO:0035064:GO:0036297:GO:0003690:GO:0051096:GO:0005794:GO:0009411:GO:0097193:GO:0000710:GO:0005654:GO:0000287:GO:0005524:GO:0032405:GO:0043570:GO:0043231:GO:0016032:GO:0032300:GO:0005829:GO:0032301:GO:0030983:GO:0045190:GO:0008094:GO:0006290:GO:0042803:GO:0032142:GO:0032143:GO:0008630:GO:0003682:GO:0006298:GO:0043531:GO:0000400:GO:0045910:GO:0005634:GO:…	600678	PF01624:PF00855:PF05188:PF05192:PF00488:PF05190	7.98	NA
chr2:48032099	SNV	A	1	A/C	PASS	4.207266283844119e-254	1071	A=521,C=550	A=0.4865,C=0.5135	51.35	NA	MSH6	NM_000179.3	MSH6:exonic:NM_000179.3	missense	GAC	6	p.Glu1163Asp	c.3489A>C	0.03	0.045	45.0	C	NA	NA	NA	Uncertain significance	NA	rs531674673:rs63750359	NA	(dui:ACMG59;dis:ACMG Recommendations...;g:MSH6)(dui:D009369;dis:Neoplasms;g:MSH6)(dui:D009371;dis:Neoplasms by Site;g:MSH6)(dui:D009358;dis:Congenital, Hereditary, and Neonatal Diseases and Abnormalities;g:MSH6)(dui:D030342;dis:Genetic Diseases, Inborn;g:MSH6)(dui:D009386;dis:Neoplastic Syndromes, Hereditary;g:MSH6)(dui:D004066;dis:Digestive System Diseases;g:MSH6)(dui:D004067;dis:Digestive Syste…	NA	AF_EAS=0.0:AF_AFR=0.0:AF_SAS=0.0:AF_FIN=0.0:AF_Adj=8.243E-6:AF_NFE=0.0:AF_OTH=0.0:AF_AMR=8.667E-5	GO:0016447:GO:0016887:GO:0006281:GO:0008340:GO:0035064:GO:0036297:GO:0003690:GO:0051096:GO:0005794:GO:0009411:GO:0097193:GO:0000710:GO:0005654:GO:0000287:GO:0005524:GO:0032405:GO:0043570:GO:0043231:GO:0016032:GO:0032300:GO:0005829:GO:0032301:GO:0030983:GO:0045190:GO:0008094:GO:0006290:GO:0042803:GO:0032142:GO:0032143:GO:0008630:GO:0003682:GO:0006298:GO:0043531:GO:0000400:GO:0045910:GO:0005634:GO:…	600678	PF01624:PF00855:PF05188:PF05192:PF00488:PF05190	1.04	NA

## Sheet: UniqueNonMMR_VUSs
List of Variants of Uncertain Significance in in exonic regions of the non-mismatch repair genes with MAF≤0.05.
# locus	type	ref	length	genotype	filter	pvalue	coverage	allele_coverage	allele_ratio	%_frequency	maf	gene	transcript	location	function	codon	exon	protein	coding	sift	polyphen	grantham	normalizedAlt	5000Exomes	FATHMM	NamedVariants	clinvar	cosmic	dbsnp	dgv	dra	drugbank	exac	go	omim	pfam	phylop	MyVariantDefaultDb_hg19
chr12:133257855	SNV	C	1	C/T	PASS	2.0849709101237405e-69	304	C=152,T=152	C=0.5,T=0.5	50.00	NA	POLE	NM_006231.4	POLE:exonic:NM_006231.4	missense	ACC	2	p.Ala25Thr	c.73G>A	0.42	0.002	58.0	T	NA	0.23	NA	Uncertain significance	937344	rs773204331	NA	(dui:D009369;dis:Neoplasms;g:POLE)(dui:D009371;dis:Neoplasms by Site;g:POLE)(dui:D004066;dis:Digestive System Diseases;g:POLE)(dui:D004067;dis:Digestive System Neoplasms;g:POLE)(dui:D005767;dis:Gastrointestinal Diseases;g:POLE)(dui:D005770;dis:Gastrointestinal Neoplasms;g:POLE)(dui:D007410;dis:Intestinal Diseases;g:POLE)(dui:D003108;dis:Colonic Diseases;g:POLE)(dui:D007414;dis:Intestinal Neoplasm…	Cladribine	AF_EAS=0.0:AF_AFR=0.0:AF_SAS=6.058E-5:AF_FIN=0.0:AF_Adj=2.474E-5:AF_NFE=3E-5:AF_OTH=0.0:AF_AMR=0.0	GO:0006270:GO:0090305:GO:0008270:GO:0006260:GO:0006272:GO:0006297:GO:0048568:GO:0003682:GO:0006287:GO:0008310:GO:0045004:GO:0000731:GO:0000278:GO:0005886:GO:0005654:GO:0008622:GO:0000166:GO:0003677:GO:0005634:GO:0003887:GO:0005515:GO:0000082:GO:0032201:GO:0051539	174762	PF13482:PF08490:PF10108:PF03104:PF00136	-0.46	NA
chr12:133219285	SNV	C	1	C/T	PASS	5.413772478826861e-47	154	C=66,T=88	C=0.4286,T=0.5714	57.14	NA	POLE	NM_006231.4	POLE:exonic:NM_006231.4	missense	ATT	37	p.Val1587Ile	c.4759G>A	0.34	0.0	29.0	T	GMAF=1.0E-4:AMAF=2.0E-4:EMAF=0.0	NA	NA	Uncertain significance	NA	rs372388555	NA	(dui:D009369;dis:Neoplasms;g:POLE)(dui:D009371;dis:Neoplasms by Site;g:POLE)(dui:D004066;dis:Digestive System Diseases;g:POLE)(dui:D004067;dis:Digestive System Neoplasms;g:POLE)(dui:D005767;dis:Gastrointestinal Diseases;g:POLE)(dui:D005770;dis:Gastrointestinal Neoplasms;g:POLE)(dui:D007410;dis:Intestinal Diseases;g:POLE)(dui:D003108;dis:Colonic Diseases;g:POLE)(dui:D007414;dis:Intestinal Neoplasm…	Cladribine	AF_EAS=0.0:AF_AFR=1.942E-4:AF_SAS=0.0:AF_FIN=0.0:AF_Adj=1.652E-5:AF_NFE=0.0:AF_OTH=0.0:AF_AMR=0.0	GO:0006270:GO:0090305:GO:0008270:GO:0006260:GO:0006272:GO:0006297:GO:0048568:GO:0003682:GO:0006287:GO:0008310:GO:0045004:GO:0000731:GO:0000278:GO:0005886:GO:0005654:GO:0008622:GO:0000166:GO:0003677:GO:0005634:GO:0003887:GO:0005515:GO:0000082:GO:0032201:GO:0051539	174762	PF13482:PF08490:PF10108:PF03104:PF00136	1.46	NA
chr12:133225520	SNV	G	1	G/A	PASS	1.0185913880541066e-123	563	G=285,A=278	G=0.5062,A=0.4938	49.38	NA	POLE	NM_006231.4	POLE:exonic:NM_006231.4	missense	TGC	32	p.Arg1382Cys	c.4144C>T	0.0	0.994	180.0	A	NA	0.95	NA	Uncertain significance	3458337	rs5744904	NA	(dui:D009369;dis:Neoplasms;g:POLE)(dui:D009371;dis:Neoplasms by Site;g:POLE)(dui:D004066;dis:Digestive System Diseases;g:POLE)(dui:D004067;dis:Digestive System Neoplasms;g:POLE)(dui:D005767;dis:Gastrointestinal Diseases;g:POLE)(dui:D005770;dis:Gastrointestinal Neoplasms;g:POLE)(dui:D007410;dis:Intestinal Diseases;g:POLE)(dui:D003108;dis:Colonic Diseases;g:POLE)(dui:D007414;dis:Intestinal Neoplasm…	Cladribine	NA	GO:0006270:GO:0090305:GO:0008270:GO:0006260:GO:0006272:GO:0006297:GO:0048568:GO:0003682:GO:0006287:GO:0008310:GO:0045004:GO:0000731:GO:0000278:GO:0005886:GO:0005654:GO:0008622:GO:0000166:GO:0003677:GO:0005634:GO:0003887:GO:0005515:GO:0000082:GO:0032201:GO:0051539	174762	PF13482:PF08490:PF10108:PF03104:PF00136	3.11	NA
chr12:133225996	SNV	C	1	C/T	PASS	2.583449639258471e-75	299	C=142,T=157	C=0.4749,T=0.5251	52.51	NA	POLE	NM_006231.4	POLE:exonic:NM_006231.4	missense	ATG	31	p.Val1301Met	c.3901G>A	0.11	0.001	21.0	T	NA	NA	NA	Uncertain significance	NA	rs112098447	NA	(dui:D009369;dis:Neoplasms;g:POLE)(dui:D009371;dis:Neoplasms by Site;g:POLE)(dui:D004066;dis:Digestive System Diseases;g:POLE)(dui:D004067;dis:Digestive System Neoplasms;g:POLE)(dui:D005767;dis:Gastrointestinal Diseases;g:POLE)(dui:D005770;dis:Gastrointestinal Neoplasms;g:POLE)(dui:D007410;dis:Intestinal Diseases;g:POLE)(dui:D003108;dis:Colonic Diseases;g:POLE)(dui:D007414;dis:Intestinal Neoplasm…	Cladribine	NA	GO:0006270:GO:0090305:GO:0008270:GO:0006260:GO:0006272:GO:0006297:GO:0048568:GO:0003682:GO:0006287:GO:0008310:GO:0045004:GO:0000731:GO:0000278:GO:0005886:GO:0005654:GO:0008622:GO:0000166:GO:0003677:GO:0005634:GO:0003887:GO:0005515:GO:0000082:GO:0032201:GO:0051539	174762	PF13482:PF08490:PF10108:PF03104:PF00136	0.46	NA
chr10:88649936	SNV	A	1	A/G	PASS	3.4514373933586494e-143	552	A=257,G=295	A=0.4656,G=0.5344	53.44	NA	BMPR1A	NM_004329.3	BMPR1A:exonic:NM_004329.3	missense	TGT	4	p.Tyr62Cys	c.185A>G	0.0	0.952	194.0	G	NA	NA	NA	Uncertain significance	NA	rs1060503402	NA	(dui:ACMG59;dis:ACMG Recommendations...;g:BMPR1A)(dui:D009358;dis:Congenital, Hereditary, and Neonatal Diseases and Abnormalities;g:BMPR1A)(dui:D009369;dis:Neoplasms;g:BMPR1A)(dui:D009386;dis:Neoplastic Syndromes, Hereditary;g:BMPR1A)(dui:D030342;dis:Genetic Diseases, Inborn;g:BMPR1A)(dui:D004066;dis:Digestive System Diseases;g:BMPR1A)(dui:D005767;dis:Gastrointestinal Diseases;g:BMPR1A)(dui:D0074…	Dibotermin alfa	NA	GO:0060045:GO:0060043:GO:0007179:GO:0009950:GO:1904414:GO:0021998:GO:0043025:GO:0009953:GO:0042733:GO:0003203:GO:0030425:GO:0005901:GO:0006955:GO:0048368:GO:0001701:GO:0071773:GO:0030509:GO:0035912:GO:0001707:GO:0050679:GO:0030501:GO:0019827:GO:0014032:GO:0003183:GO:0002053:GO:0003186:GO:0043235:GO:0048568:GO:0004674:GO:0001880:GO:0003222:GO:0003223:GO:0005886:GO:0000981:GO:0004675:GO:0021983:GO:…	601299	PF01064:PF00069:PF07714:PF08515	8.57	NA
chr12:133252696	SNV	A	1	A/C	PASS	5.62341325190349e-213	989	A=504,C=485	A=0.5096,C=0.4904	49.04	NA	POLE	NM_006231.4	POLE:exonic:NM_006231.4	missense	TGC	10	p.Phe335Cys	c.1004T>G	0.0	0.999	205.0	C	NA	NA	NA	Uncertain significance	NA	rs1593078268	NA	(dui:D009369;dis:Neoplasms;g:POLE)(dui:D009371;dis:Neoplasms by Site;g:POLE)(dui:D004066;dis:Digestive System Diseases;g:POLE)(dui:D004067;dis:Digestive System Neoplasms;g:POLE)(dui:D005767;dis:Gastrointestinal Diseases;g:POLE)(dui:D005770;dis:Gastrointestinal Neoplasms;g:POLE)(dui:D007410;dis:Intestinal Diseases;g:POLE)(dui:D003108;dis:Colonic Diseases;g:POLE)(dui:D007414;dis:Intestinal Neoplasm…	Cladribine	NA	GO:0006270:GO:0090305:GO:0008270:GO:0006260:GO:0006272:GO:0006297:GO:0048568:GO:0003682:GO:0006287:GO:0008310:GO:0045004:GO:0000731:GO:0000278:GO:0005886:GO:0005654:GO:0008622:GO:0000166:GO:0003677:GO:0005634:GO:0003887:GO:0005515:GO:0000082:GO:0032201:GO:0051539	174762	PF13482:PF08490:PF10108:PF03104:PF00136	9.24	NA
chr5:112176329	SNV	C	1	C/G	PASS	1.6292960326396815e-247	1202	C=624,G=578	C=0.5191,G=0.4809	48.09	NA	APC	NM_000038.6	APC:exonic:NM_000038.6	missense	GAG	16	p.Gln1680Glu	c.5038C>G	0.6	0.0	29.0	G	NA	0.5	NA	Uncertain significance	6918453	rs754122018	NA	(dui:ACMG59;dis:ACMG Recommendations...;g:APC)(dui:D009369;dis:Neoplasms;g:APC)(dui:D009371;dis:Neoplasms by Site;g:APC)(dui:D009370;dis:Neoplasms by Histologic Type;g:APC)(dui:D004066;dis:Digestive System Diseases;g:APC)(dui:D004067;dis:Digestive System Neoplasms;g:APC)(dui:D009375;dis:Neoplasms, Glandular and Epithelial;g:APC)(dui:D005767;dis:Gastrointestinal Diseases;g:APC)(dui:D005770;dis:Gas…	NA	AF_EAS=0.0:AF_AFR=0.0:AF_SAS=0.0:AF_FIN=0.0:AF_Adj=8.299E-6:AF_NFE=0.0:AF_OTH=0.0:AF_AMR=8.717E-5	GO:0007050:GO:0007094:GO:0016328:GO:0000776:GO:0005874:GO:0045295:GO:0045296:GO:0005829:GO:0016055:GO:0070840:GO:0001708:GO:0019887:GO:0120162:GO:0030027:GO:0032886:GO:0019901:GO:1904781:GO:0065003:GO:0031274:GO:0007026:GO:0007389:GO:0045732:GO:0005881:GO:0006974:GO:0045736:GO:0005886:GO:0005634:GO:0005912:GO:0005515:GO:0031625:GO:0051010:GO:0070830:GO:0010942:GO:0030335:GO:1990909:GO:0008286:GO:…	611731	PF05937:PF00514:PF05924:PF16630:PF16633:PF16635:PF16634:PF16689:PF11414:PF16636:PF16629:PF05972:PF05956:PF05923	0.85	NA
chr12:133225540	SNV	G	1	G/A	PASS	1.2473835142429535e-182	931	G=494,A=437	G=0.5306,A=0.4694	46.94	NA	POLE	NM_006231.3	POLE:exonic:NM_006231.3	missense	GTG	32	p.Ala1375Val	c.4124C>T	0.09	0.002	64.0	A	NA	0.86	NA	Uncertain significance	2001639:2001640	rs766168647	NA	(dui:D009369;dis:Neoplasms;g:POLE)(dui:D009371;dis:Neoplasms by Site;g:POLE)(dui:D004066;dis:Digestive System Diseases;g:POLE)(dui:D004067;dis:Digestive System Neoplasms;g:POLE)(dui:D005767;dis:Gastrointestinal Diseases;g:POLE)(dui:D005770;dis:Gastrointestinal Neoplasms;g:POLE)(dui:D007410;dis:Intestinal Diseases;g:POLE)(dui:D003108;dis:Colonic Diseases;g:POLE)(dui:D007414;dis:Intestinal Neoplasm…	Cladribine	AF_OTH=0.0:AF_Adj=2.489E-5:AF_AFR=0.0:AF_EAS=0.0:AF_FIN=0.0:AF_SAS=1.852E-4:AF_NFE=0.0:AF_AMR=0.0	GO:0006281:GO:0006260:GO:0006287:GO:0045004:GO:0000731:GO:0005654:GO:0008622:GO:0000166:GO:0003887:GO:0000082:GO:0032201:GO:0071897:GO:0006270:GO:0090305:GO:0008270:GO:0006272:GO:0006297:GO:0048568:GO:0003682:GO:0008310:GO:0005886:GO:0003677:GO:0005634:GO:0008408:GO:0005515:GO:0051539	NA	PF13482:PF08490:PF10108:PF03104:PF00136	2.57	NA
chr12:133250183	SNV	C	1	C/T	PASS	3.817684194975452e-83	499	C=283,T=216	C=0.5671,T=0.4329	43.29	NA	POLE	NM_006231.3	POLE:exonic:NM_006231.3	missense	CAG	13	p.Arg446Gln	c.1337G>A	0.09	0.994	43.0	T	AMAF=5.0E-4:GMAF=5.0E-4:EMAF=6.0E-4	0.99:0.99	NA	Uncertain significance	692187:692188:5031059	rs151273553	NA	(dui:D009369;dis:Neoplasms;g:POLE)(dui:D009371;dis:Neoplasms by Site;g:POLE)(dui:D004066;dis:Digestive System Diseases;g:POLE)(dui:D004067;dis:Digestive System Neoplasms;g:POLE)(dui:D005767;dis:Gastrointestinal Diseases;g:POLE)(dui:D005770;dis:Gastrointestinal Neoplasms;g:POLE)(dui:D007410;dis:Intestinal Diseases;g:POLE)(dui:D003108;dis:Colonic Diseases;g:POLE)(dui:D007414;dis:Intestinal Neoplasm…	Cladribine	AF_OTH=0.0:AF_Adj=2.562E-4:AF_AFR=1.93E-4:AF_EAS=0.0:AF_FIN=3.025E-4:AF_SAS=0.0:AF_NFE=4.064E-4:AF_AMR=0.0	GO:0006281:GO:0006260:GO:0006287:GO:0045004:GO:0000731:GO:0005654:GO:0008622:GO:0000166:GO:0003887:GO:0000082:GO:0032201:GO:0071897:GO:0006270:GO:0090305:GO:0008270:GO:0006272:GO:0006297:GO:0048568:GO:0003682:GO:0008310:GO:0005886:GO:0003677:GO:0005634:GO:0008408:GO:0005515:GO:0051539	NA	PF13482:PF08490:PF10108:PF03104:PF00136	7.72	NA
chr12:133234521	SNV	G	1	G/A	PASS	5.9156163417546214e-182	781	G=384,A=397	G=0.4917,A=0.5083	50.83	NA	POLE	NM_006231.4	POLE:exonic:NM_006231.4	missense	ATG	27	p.Thr1104Met	c.3311C>T	0.11	0.074	81.0	A	NA	0.79	NA	Uncertain significance	937298	rs531705054	NA	(dui:D009369;dis:Neoplasms;g:POLE)(dui:D009371;dis:Neoplasms by Site;g:POLE)(dui:D004066;dis:Digestive System Diseases;g:POLE)(dui:D004067;dis:Digestive System Neoplasms;g:POLE)(dui:D005767;dis:Gastrointestinal Diseases;g:POLE)(dui:D005770;dis:Gastrointestinal Neoplasms;g:POLE)(dui:D007410;dis:Intestinal Diseases;g:POLE)(dui:D003108;dis:Colonic Diseases;g:POLE)(dui:D007414;dis:Intestinal Neoplasm…	Cladribine	AF_EAS=0.0:AF_AFR=1.924E-4:AF_SAS=1.212E-4:AF_FIN=0.0:AF_Adj=4.945E-5:AF_NFE=1.499E-5:AF_OTH=0.0:AF_AMR=8.64E-5	GO:0006270:GO:0090305:GO:0008270:GO:0006260:GO:0006272:GO:0006297:GO:0048568:GO:0003682:GO:0006287:GO:0008310:GO:0045004:GO:0000731:GO:0000278:GO:0005886:GO:0005654:GO:0008622:GO:0000166:GO:0003677:GO:0005634:GO:0003887:GO:0005515:GO:0000082:GO:0032201:GO:0051539	174762	PF13482:PF08490:PF10108:PF03104:PF00136	1.38	NA
chr12:133225927	SNV	G	1	G/A	PASS	5.1999599653349174e-225	1042	G=530,A=512	G=0.5086,A=0.4914	49.14	NA	POLE	NM_006231.4	POLE:exonic:NM_006231.4	missense	TGC	31	p.Arg1324Cys	c.3970C>T	0.0	0.999	180.0	A	NA	1	NA	Uncertain significance	8210213	rs779464847	NA	(dui:D009369;dis:Neoplasms;g:POLE)(dui:D009371;dis:Neoplasms by Site;g:POLE)(dui:D004066;dis:Digestive System Diseases;g:POLE)(dui:D004067;dis:Digestive System Neoplasms;g:POLE)(dui:D005767;dis:Gastrointestinal Diseases;g:POLE)(dui:D005770;dis:Gastrointestinal Neoplasms;g:POLE)(dui:D007410;dis:Intestinal Diseases;g:POLE)(dui:D003108;dis:Colonic Diseases;g:POLE)(dui:D007414;dis:Intestinal Neoplasm…	Cladribine	AF_EAS=0.0:AF_AFR=1.038E-4:AF_SAS=1.82E-4:AF_FIN=0.0:AF_Adj=7.647E-5:AF_NFE=7.792E-5:AF_OTH=0.0:AF_AMR=0.0	GO:0006270:GO:0090305:GO:0008270:GO:0006260:GO:0006272:GO:0006297:GO:0048568:GO:0003682:GO:0006287:GO:0008310:GO:0045004:GO:0000731:GO:0000278:GO:0005886:GO:0005654:GO:0008622:GO:0000166:GO:0003677:GO:0005634:GO:0003887:GO:0005515:GO:0000082:GO:0032201:GO:0051539	174762	PF13482:PF08490:PF10108:PF03104:PF00136	6.34	NA
